1  
2  
3  
4  
5  
6  
7  
8  
9  
10  
11  
12  
13  
14  
15  
16  
17  
18  
19  
20  
21

**Intra-species transcriptional profiling reveals key regulators of *Candida albicans*  
pathogenic traits**

Joshua M. Wang<sup>1†‡</sup>, Andrew L. Woodruff<sup>1†</sup>, Matthew J Dunn<sup>1</sup>, Robert J. Fillinger<sup>1</sup>  
Richard J. Bennett<sup>2</sup>, and Matthew Z. Anderson<sup>1,3\*</sup>

<sup>1</sup>Department of Microbiology, The Ohio State University, Columbus, OH, 43210, USA.

<sup>2</sup>Department of Molecular Microbiology and Immunology, Brown University, Providence, RI, 02912, USA.

<sup>3</sup>Department of Microbial Infection and Immunity, The Ohio State University, Columbus, OH, 43210, USA.

†Equal contributions

‡Current address: New York University, School of Medicine, New York, NY, 94550, USA

\* **correspondence:** anderson.3196@osu.edu

22 **ABSTRACT**

23           The human commensal and opportunistic fungal pathogen *Candida albicans*  
24 displays extensive genetic and phenotypic variation across clinical isolates. Here, we  
25 performed RNA sequencing on 21 well-characterized isolates to examine how genetic  
26 variation contributes to gene expression differences, and to link these differences to  
27 phenotypic traits. *C. albicans* adapts primarily through clonal evolution and yet  
28 hierarchical clustering of gene expression profiles in this set of isolates did not  
29 reproduce their phylogenetic relationship. Strikingly, strain-specific gene expression was  
30 prevalent in some strain backgrounds. Association of gene expression with phenotypic  
31 data by differential analysis, linear correlation, and assembly of gene networks  
32 connected both previously characterized and novel genes with 23 *C. albicans* traits.  
33 Construction of *de novo* gene modules produced a gene atlas incorporating 67% of *C.*  
34 *albicans* genes and revealed correlations between expression modules and important  
35 phenotypes such as systemic virulence. Furthermore, targeted investigation of two  
36 modules that have novel roles in growth and filamentation supported our bioinformatic  
37 predictions. Together, these studies reveal widespread transcriptional variation across  
38 *C. albicans* isolates and identify genetic and epigenetic links to phenotypic variation  
39 based on co-expression network analysis.

## 40 **Importance**

41           Infectious fungal species are often treated uniformly despite clear evidence of  
42 genotypic and phenotypic heterogeneity being widespread across strains. Identifying  
43 the genetic basis for this phenotypic diversity is extremely challenging because of the  
44 tens or hundreds of thousands of variants that may distinguish two strains. Here we use  
45 transcriptional profiling to determine differences in gene expression that can be linked to  
46 phenotypic variation among a set of 21 *Candida albicans* isolates. Analysis of this  
47 transcriptional dataset uncovered clear trends in gene expression characteristics for this  
48 species and new genes and pathways that associated with variation in pathogenic  
49 processes. Direct investigation confirmed functional predictions for a number of new  
50 regulators associated with growth and filamentation, demonstrating the utility of these  
51 approaches in linking genes to important phenotypes.

52

## 53 INTRODUCTION

54 *Candida albicans* resides within the oral cavity, gastrointestinal tract,  
55 genitourinary tract, and on the skin of its human host as a commensal species (1).  
56 Development of an immunocompromised state can lead to *C. albicans* overgrowth of  
57 these same niches, producing debilitating mucosal infections and life-threatening  
58 bloodstream infections (2, 3). Critical to its success as both a ubiquitous commensal  
59 and opportunistic pathogen of multiple body sites is the ability for *C. albicans* to persist  
60 and proliferate in a wide range of physiological temperatures, oxic environments,  
61 nutrient availabilities, and pH conditions (4-6).

62 Clinical isolates of *C. albicans* represent a genetically diverse collection of  
63 heterozygous diploid organisms that can be separated into seventeen clades by  
64 multilocus sequence typing (MLST), with Clade I clade making up the majority of typed  
65 isolates (7-9). Recent sequencing efforts have examined genomes from across the *C.*  
66 *albicans* phylogeny (10, 11). Analysis of these genomes supports a primarily clonal  
67 lifestyle for *C. albicans*, with occasional inter-clade mating generating recombinant  
68 genomes in a subset of isolates (10, 12). Thus, *C. albicans* evolves principally through  
69 the acquisition and accumulation of iterative mutations, leading to expanded genotypic  
70 diversity over time.

71 This genotypic diversity contributes to extensive phenotypic variation among *C*  
72 *albicans* isolates, including an assortment of alternative cell states associated with  
73 distinct colonization and pathogenic traits (11, 13-21). Some phenotypes are biased  
74 towards specific *C. albicans* clades (22, 23). For example, inherent resistance to the  
75 antifungal 5-flucytosine (5-FC) is mediated by a single missense mutation in *FUR1*

76 found ubiquitously across Clade I strains but absent in those from other clades (24, 25).  
77 In contrast, most phenotypes are heterogeneous both within and across *C. albicans*  
78 clades (11, 26-28), suggesting multi-locus control of these traits. This incongruence  
79 between genetic and phenotypic similarity in *C. albicans* deviates significantly from  
80 other asexual species in which phylogenetic conservation has been used to predict  
81 phenotypic traits (29-31). It has also complicated large-scale investigations of the  
82 underlying polymorphisms that contribute to *C. albicans* phenotypic diversity and limited  
83 identification of genotype-phenotype relationships (10, 11, 23). Instead, phenotypic  
84 diversity may associate more strongly with other molecular signatures such as gene  
85 expression and protein abundance (32-34).

86         The ability to rapidly respond to environmental cues is central to microbial  
87 adaptive potential. *C. albicans* adopts distinct transcriptional profiles in different cell  
88 states or when cultured in different physiologically-relevant conditions (13, 35, 36).  
89 Altered transcriptional states can be detected as early as 5 minutes following exposure  
90 to new environments (37-40). Distinct transcriptional responses in *C. albicans* are also  
91 observed in response to cues in the host, and these may contribute to colonization and  
92 pathogenesis in different niches (41-43).

93         Altered expression of hundreds of genes following environmental shifts  
94 complicates distinguishing the regulatory genes that govern these transcriptional  
95 changes from downstream effectors. Defining the genetic regulons associated with  
96 specific transcription factors or responses has typically relied on a simple model of  
97 conditional expression focused on a single gene or environmental condition (44-46),  
98 while the broader transcriptional architecture of *C. albicans* cells remains largely

99 undefined. Concerted efforts to determine the transcriptional regulation of phenotypic  
100 switching between the *C. albicans* 'white' and 'opaque' states or between planktonic  
101 and biofilm communities has revealed the existence of highly interconnected  
102 transcription factor networks that collectively control differentiation between these states  
103 (47-51). Genes within these circuits encode some of the most well-characterized  
104 transcription factors in *C. albicans* and yet account for only a small fraction of the  
105 complete repertoire of transcriptional regulators. Thus, integration of large-scale  
106 expression data across *C. albicans* isolates could aid in elucidating the transcriptional  
107 networks underlying the regulatory architecture of this important human pathogen.

108         Here, we describe transcriptional profiling of 21 *C. albicans* isolates representing  
109 five clades with significant genotypic and phenotypic diversity (11). Gene expression  
110 profiles of these strains did not reflect their phylogenetic relationships at either the strain  
111 or clade level. Moreover, differential gene expression of up to 35% of the annotated  
112 genes was found between any two strains grown under identical conditions, with several  
113 strains displaying extensive strain-specific gene expression. Transcriptional differences  
114 between strains were associated with specific phenotypes that corroborate previous  
115 experimental studies and also predicted new molecular functions related to  
116 pathogenesis. Furthermore, unbiased clustering of genes based on correlated gene  
117 expression levels revealed a transcriptional map of cellular functions from which co-  
118 expression modules were linked to pathogen-associated phenotypes. Experimental  
119 investigation of two co-expression modules uncovered new regulators of filamentation  
120 and a cell state-specific module, and that these contribute to intra-species phenotypic  
121 variation in *C. albicans*.

## 122 RESULTS

123 A previous investigation sequenced the genomes of 21 *C. albicans* isolates and  
124 identified widespread genetic and phenotypic variation among the strain set (11).  
125 Candidate gene approaches identified one strain with a homozygous nonsense  
126 mutation in the transcriptional regulator *EFG1* that caused a defect in filamentation and  
127 increased commensal fitness while decreasing systemic virulence (11). More recently,  
128 loss of *EFG1* function was also linked to formation of the “gray” phenotypic state in  
129 clinical isolates (13). However, broader attempts to link genetic polymorphisms to  
130 phenotypic differences present a significant challenge as multiple loci may regulate a  
131 single trait. Consequently, many of the causative polymorphisms contributing to  
132 phenotypic variation remain unknown. To gain greater insight into the underlying basis  
133 of phenotypic diversity in *C. albicans*, we transcriptionally profiled the set of 21 isolates  
134 with diverse geographical origins, sites of infection, and clade designations within the *C.*  
135 *albicans* phylogeny (Fig. S1).

136

### 137 Gene expression does not reflect genetic relatedness

138 To compare gene expression across the 21 isolates, RNA was harvested from  
139 cells cultured in rich media (YPD, 30°C) in exponential phase. Transcript abundances  
140 were averaged between biological duplicates and binned across the 6,468 genes. The  
141 largest fraction of transcripts in the SC5314 reference genome were present at low but  
142 detectable expression levels (10-100 transcripts per million (TPM)), although the  
143 number of genes within each expression range fluctuated considerably among strains  
144 (Fig S2A, Table [S1](#)). For example, P37037 expressed 25.3% of its genes at less than

145 10 TPM whereas this proportion increased to ~50% in GC75. Differential binning of  
146 gene expression even occurred among strains in the same clade (e.g., compare Clade  
147 II strains P57072 v. P76067), suggesting that large changes in genome-wide transcript  
148 abundance exist even between closely-related strains.

149 To determine if gene expression patterns were reflective of genetic relatedness,  
150 hierarchical clustering of genome-wide TPM values was performed. Similarity in gene  
151 expression profiles failed to reproduce the genetic phylogeny of these strains when  
152 averaged between replicates (Fig. 1A) or as individual samples (Fig. 2B). Variability in  
153 low abundance transcripts was not responsible for obscuring phylogenetic similarity as  
154 none of the 50 genes with the greatest dynamic range in expression recapitulated the  
155 phylogenetic tree (Fig. S2C). In fact, averaged expression of only 0.5% of all genes (31  
156 of 6468) associated with phylogenetic similarity, and these genes were functionally  
157 enriched for transcriptional regulation by glucose (Fig. S2D).

158 In a few select cases, averaged gene expression levels among strains within a  
159 single clade were similar, such as those within Clade III and among a subset of Clade  
160 SA strains (Fig. 1B, outlined in yellow). Indeed, gene expression within this strain set  
161 was more similar among intra-clade comparisons than inter-clade comparisons  
162 (Wilcoxon test,  $W = 4978$ ,  $p\text{-value} = 0.022$ ), supporting evidence of clade-associated  
163 expression signatures among these isolates. Regardless, intra- and inter-clade  
164 correlations of gene expression largely overlapped (average: 0.783 vs. 0.759; range:  
165 0.33-0.97 v. 0.54-0.96, respectively, Fig. 1C), and Clade III strains largely drove the  
166 differences between intra-clade and inter-clade comparisons, which disappeared when  
167 these strains were removed (Brunner Munzel test ( $BM = 0.500$ ,  $df = 78.9$ ,  $p = 0.62$ ). The



168 two isolates in this set that have been proposed to harbor recombinant genomes,  
169 P60002 and P94015 (12), exhibited divergent genomes consistent with inter-clade  
170 comparisons of nucleotide divergence, and P60002 displayed the most divergent gene  
171 expression comparisons of any other strain (Fig. 1C). This further supports these  
172 isolates as being genetically distinct with unique expression patterns as compared to  
173 other strains from their assigned clades, and is in line with these two isolates having  
174 undergone inter-clade recombination during their evolutionary history (12).

175 Gene expression patterns were also compared between *C. albicans* clades, as  
176 some phenotypes have been associated with specific clades and clade-level  
177 comparisons can reduce the influence of 'outlier' strains (22, 23). However, with the  
178 exception of Clades II and III, similarities in clade-average expression levels were not  
179 enriched among the more closely-related clades (Fig. 1D, S3). Thus, genetic similarity  
180 contributes to, but does not strictly determine, similarity among *C. albicans* gene  
181 expression profiles.

182

### 183 **Gene expression differences between *C. albicans* isolates span biological traits**

184 The set of *C. albicans* strains analyzed here exhibit up to 1.7% nucleotide  
185 divergence in pairwise comparisons (12), highlighting the potential for large-scale  
186 differences in genetic regulation and gene expression. The number of differentially  
187 expressed genes between any two isolates varied considerably, ranging from 43 to  
188 1,457 genes (adjusted p-value 0.05,  $\geq$  2-fold change) (Tables [S2](#), [S3](#)), and increased  
189 with greater dissimilarity in overall gene expression (Pearson's test;  $r = -0.86$ ,  $n = 210$ ,  $p$   
190  $< 2.2E-16$ , Fig. S4). Investigation of gene ontologies (GO) associated with differentially

191 expressed genes between isolates returned 147 process terms spanning the full  
192 breadth of biology (Table [S4](#)). The most prevalent GO terms were associated with  
193 ribosome biogenesis followed by nucleic acid and aromatic compound metabolism,  
194 suggesting that some isolates may have evolved unique growth characteristics,  
195 pathways to control nutrient utilization or signaling, and/or preferred nutrient conditions  
196 for optimal growth. Conversely, consistent gene expression levels across isolates point  
197 to core functions required for basic cellular processes in this diploid yeast. Of the 5,956  
198 complete and intact open reading frames (ORFs) present across all 21 *C. albicans*  
199 isolates, 2,036 genes displayed indistinguishable expression levels among all strains.  
200 These include genes for key cellular functions such as amino acid charging of tRNAs,  
201 RNA polymerase function, and core translational processes (Table [S5](#)).

202 A distinctive class of genes considered were those expressed at unique levels  
203 within a single strain compared to all other strains and therefore classified as having  
204 strain-specific expression. The number of strain-specific genes varied considerably,  
205 ranging from 0 in isolates 12C, 19F, P37005, and P57055 to 171 in GC75 ( $q \leq 0.05$  and  
206 2-fold change, Fig. S5). Strain-specific expression was enriched for cellular processes  
207 ranging from cell wall organization (GC75) to oxidation-reduction (P78042) to  
208 mannosyltransferase activity (P60002) and RNA Polymerase I activity (P57072) (Table  
209 [S6](#)). Isolates with the largest number of uniquely expressed genes typically clustered  
210 closely with other strains in the phylogenetic tree (Fig. S1), further highlighting the  
211 disconnect between genetic relatedness and gene expression.

212

213 **Characteristics of functional noncoding RNA elements**

214 Untranslated regions in *C. albicans* can serve as regulatory platforms for protein  
215 binding to control transcript stability and translation (52, 53). The average 5' UTR length  
216 for 5,076 genes with detectable expression among all sequenced isolates centered at 1-  
217 25 bp and decreased in frequency with greater lengths (Fig. S6A). Prior analysis has  
218 revealed that some *C. albicans* transcription factors have extended 5' UTRs greater  
219 than 1 kilobase (kb) in length (36, 52-54). Analysis of all transcription factor genes  
220 among the 21 strains showed they encoded significantly longer 5' UTRs compared to  
221 the genome-wide average (286 v 97 bp, respectively; Wilcoxon test,  $W = 3.97E5$ ,  $p$ -  
222 value  $< 2.2E-16$ ; Fig. S6B, Table [S7](#)). In contrast, 3' UTRs were, on average, between  
223 25 and 75 bp for the 5,899 genes with detectable expression. Genes involved in protein  
224 translation were found to contain significantly longer 3' UTRs than the genome average  
225 (141 v 44 bp, respectively; Wilcoxon test,  $W = 8.63E5$ ,  $p$ -value  $< 2.2E-16$ ; Fig. S6C,  
226 Table [S8](#)), which may also implicate important regulatory functions for these regions  
227 through either transcriptional or translational control (55).

228 Mobile genetic elements play an important role in shaping genome evolution  
229 through promoting recombination, disrupting gene function, and forming new  
230 transcriptional units (56). Previous work has catalogued the transposable elements  
231 (TEs) present in the *C. albicans* genome using their associated long terminal repeats for  
232 classification among clinical isolates (11, 57). Transcriptional profiling of the 21 *C.*  
233 *albicans* isolates revealed active expression of multiple transposon families within *C.*  
234 *albicans*. The most highly transcribed transposons were flanked by gamma class *LTR*  
235 sequences although the abundance of actively transcribed retro-elements varied  
236 immensely between strains (Fig. S7A). The RNA abundance of TEs did not reflect strain

237 relatedness or changes in genomic copy number among the isolates (Pearson's test;  $r =$   
238  $0.062$ ,  $df = 19$ ,  $p = 0.79$ , Fig. S7B), suggesting that mechanisms of transposon  
239 quiescence or inactivation may contribute to differences in expression among strains.

240

### 241 **Gene expression does not correlate with chromosomal position**

242 A previous report suggested that genes encoded at the chromosome ends could  
243 exhibit higher levels of expression plasticity, variable gene expression among cell  
244 populations (58). To assess expression plasticity, the coefficient of variation (CV)  
245 between biological replicates was calculated for all genes and averaged across the 21  
246 strains. The average CV in 10 kb sliding windows remained fairly constant across the  
247 genome, centered at approximately 0.15 (Fig. S8A). Subtelomeric genes in the 15 kb  
248 most proximal to the telomeric repeats did not show increased variability compared to  
249 the rest of the genome; in fact, the CV decreased slightly in the subtelomeres.

250 Additionally, only two of nine *TLO* genes with transcript abundance data across all  
251 strains showed elevated plasticity compared to the genome average (Students t-test;  
252  $p < 0.05$ , Fig. S8B). Instead, the majority of genes with significantly elevated expression  
253 plasticity were scattered throughout the genome (Table S9).

254

### 255 **Differentially expressed gene sets associate with *C. albicans* phenotypes**

256 Previously, the 21 sequenced *C. albicans* isolates were characterized for a  
257 diverse set of *in vitro* and *in vivo* phenotypic traits (11). Differentially expressed genes  
258 between groups with extreme phenotypes can infer the causative networks or pathways  
259 that are responsible for the divergent traits (Fig. 2A).

260 To identify genes that associate with quantitative phenotypes, we compared  
261 differentially expressed genes between strains that displayed phenotypic extremes in  
262 Hirakawa et al. (11). Overall, gene expression profiles between groups for any given  
263 phenotype were overwhelmingly similar, with the extreme groups differentially  
264 expressing between 2 and 209 genes for each phenotype ( $> 2x$  change,  $q \leq 0.05$ . Table  
265 [S10](#)). Growth phenotypes were associated with the largest number of differentially  
266 expressed genes (Fig. 2B), which may reflect the conditions used for RNA isolation  
267 (logarithmic phase growth in YPD medium at 30°C). Genes involved in cell cycle  
268 regulation, lipid metabolism, and carbohydrate metabolism were overrepresented  
269 among those differentially expressed between strains with fast/slow growth rates.  
270 Surprisingly, phenotypes not directly linked to the growth conditions in which RNA was  
271 prepared also showed differential expression of genes enriched for associated  
272 biological processes (Table [S11](#)). For example, strains with contrasting abilities to  
273 filament on Spider medium showed differential expression of genes associated with  
274 biofilm formation (11 of 129,  $q = 7.78E-3$ ) and oxidoreductase activity (8 of 129,  $q =$   
275  $9.61E-3$ ), even though they were grown as planktonic cells in YPD medium at 30°C  
276 (Fig. 2C). Interestingly, strains harboring supernumerary chromosomes differentially  
277 expressed genes involved in oxidoreductase activity using NAD<sup>+</sup>/NADH acceptors  
278 compared to their euploid counterparts (2 of 9,  $q = 3.07E-2$ ). Thus, gene expression  
279 differences could be connected to a variety of phenotypes, even though cells were  
280 isolated from a single experimental condition. This analysis was limited to phenotypes  
281 with clear opposing differences, however, and suggested that more dynamic models of

282 expression-phenotype relationships could identify additional loci responsible for  
283 phenotypic variation.

284

### 285 **Linear models link gene expression with variation in simple traits**

286 The differential gene expression analysis described above relied on categorical  
287 definitions (such as phenotypic extremes) and therefore failed to acknowledge that gene  
288 expression and quantitative traits often fall along a continuum. To incorporate non-  
289 discrete values, gene expression and phenotypic measurements were fit to a linear  
290 model. A generalized least squares model of regression was used to account for the  
291 potential influence of population structure on gene expression among the 21 strains.  
292 Expression values for the ~6,400 genes were plotted for all 21 isolates against a panel  
293 of 23 phenotypic measurements spanning growth rates, drug resistance, stress  
294 resistance, filamentation, and virulence, and significant associations identified (Table  
295 [S12](#)). Notably, growth rates correlated strongly with expression of a significant portion of  
296 the genome (e.g., expression of 1,879 genes correlated with growth rates in YPD  
297 medium at 37°C, Fig. 3A). Genes connected to growth rates across a range of  
298 conditions were often overrepresented for functions related to the cell cycle or cell  
299 division (Table [S13](#)). For example, increased growth rates in minimal, Spider, and SCD  
300 media at 30°C displayed a linear relationship with increased expression of genes  
301 overrepresented in the mitotic cell cycle ( $q < 1.40E-4$ ) and spindle assembly ( $q < 0.05$ ).  
302 This analysis also identified core regulatory processes associated with growth rates  
303 including expression levels of Mediator, a major transcriptional regulatory complex (59).

304 Expression of Mediator subunits were overrepresented for growth rates in YPD at 30°C,  
305  $\chi^2(1, N=1320)=9.48, p=2.07E-3$ , Fig. 3B).

306 In contrast, linear modeling found fewer significant relationships between gene  
307 expression and more complex traits such as biofilm formation or virulence. Intriguingly,  
308 however, the expression of a large number of genes correlated linearly with the degree  
309 of hyphal growth observed in filamentation-inducing conditions. One of these genes,  
310 *CZF1*, is a key transcription factor required for the transition to hyphal growth (60), as  
311 well as a member of the core transcriptional network governing biofilm formation (47).  
312 Our results revealed that higher expression of *CZF1* in clinical isolates (in YPD medium)  
313 correlated with increased filamentation when cells were grown on Spider medium (Fig.  
314 3C). Elevated expression of other hyphal-regulated genes including *RFX2*, *BRG1* and  
315 *ROB1* also correlated with increased filamentous growth under these conditions ( $q =$   
316  $4.66E-3, 5.23E-3, \text{ and } 7.08E-4$ , respectively). Both *BRG1* and *ROB1* are regulatory  
317 targets of Czf1 and Rfx2 (47, 51, 61), demonstrating that multiple members of known  
318 regulatory pathways can be uncovered by linear modeling of expression. Additionally,  
319 expression of ribosome and mitochondrial genes correlated with the extent of  
320 filamentation across a range of conditions (Fig. 3D), consistent with previous reports  
321 (62-64). Thus, linear modeling captured expression dependencies of key regulators with  
322 simple phenotypes but was less proficient in detecting relationships between gene  
323 expression and more complex *C. albicans* phenotypes.

### 324 **Construction of gene networks associated with phenotypic traits**

325 To capture additional cellular pathways and processes associated with both  
326 simple and complex traits, we constructed gene expression networks using weighted

327 gene correlation network analysis (WGCNA) (65). Implementation of network  
328 construction using transcript abundance of all genes across the set of 21 isolates  
329 produced 43 distinct co-expression modules (ME) (Fig. 4A, Table [S14](#)).

330 Spatial organization of the co-expression modules produced a striking  
331 arrangement in which transcriptional crosstalk between modules was evident (Fig. 4B).  
332 Color coding was used to highlight different co-expression modules in which nodes are  
333 individual genes and edges have a correlation score of at least 0.93 (Fig. 4B).

334 Surprisingly, we found that eight of the ten largest modules connect to one another to  
335 produce a ring structure, where most modules interact with a limited set of one to three  
336 other modules and that collectively incorporate expression of 67% of annotated *C.*  
337 *albicans* genes (4377 of 6468 genes). The two largest modules form the backbone of  
338 the ring structure: ME1 that includes the RNA processing and vesicular transport  
339 machinery, and ME2, which encompasses the translational machinery (Table [S15](#)).

340 These processes are connected through ME4, which is enriched for genes involved in  
341 RNA binding in the nucleolus and ribosomal genes for RNA processing and translation.  
342 Genes required for ubiquitination and the proteasome are enriched in ME3 and  
343 connected to ME2, indicative of transcriptional crosstalk in protein turnover. ME3 is  
344 linked to ME5 that contains the genes for glycerophosphodiester transport and lipid  
345 production, to ME9, which is enriched for genes involved in the metabolism of  
346 nucleotide sugars and production of biofilm matrix, and finally to ME1, which links back  
347 to nucleotide processing in RNA metabolism. Thus, our analysis produced a gene  
348 expression atlas that delineates the interconnected transcriptional control of core  
349 cellular processes in *C. albicans*.



350 Gene co-expression modules were subsequently correlated to previously  
351 characterized phenotypes (11) to infer potential regulatory links (Fig. [S9](#)). Related  
352 phenotypes clustered to the same modules in many cases (e.g., growth rates in  
353 different media clustered to ME8, and filamentation across multiple conditions clustered  
354 to ME30). These module-phenotype links often included previously characterized  
355 genotype-phenotype associations. For example, elevated expression of ME30 and  
356 ME16 genes correlated with increased filamentation and encompassed known  
357 activators of filamentation such as *BRG1* (ME30) and *SUV3* (ME16) (66, 67). However,  
358 most genes in these modules have not been previously linked to filamentation and  
359 therefore represent candidates for further investigation.

360

### 361 **Identification of a putative state-specific network**

362 Two phenotypes, growth rates and filamentation, were strongly associated with  
363 several gene co-expression modules (Fig. [S9](#)). To test WGCNA predictions of module-  
364 phenotype associations, we first interrogated the ME8 module, which was linked to  
365 growth rates under several conditions (Fig. 5A). Interestingly, a single strain, P37037,  
366 expressed genes in ME8 at higher levels than all other isolates (Fig. 5B), suggesting  
367 that ME8 conferred unique attribute(s) to this strain. The elevated expression of ME8  
368 genes in P37037 may be due to coordinated gene regulation and/or interconnectivity, as  
369 17 of the 18 genes within the ME8 network connect to a minimum of 12 other genes  
370 within the same network (Fig. 5C).

371 Analysis of P37037 colony sectors revealed two distinct cell types that resembled  
372 the previously defined 'white' and 'gray' states of *C. albicans* (Fig. 5D). *C. albicans* is

373 most commonly isolated in the white state, which is considered the default state. In  
374 contrast, the gray state represents an *efg1/efg1* null state that can readily arise in  
375 strains that are *EFG1/efg1* heterozygous due to spontaneous loss of the functional  
376 allele (13). P37037 is functionally heterozygous for *EFG1* as it contains a polymorphism  
377 at nucleotide 755 that inactivates one allele via a G252D mutation in the encoded  
378 protein (13). Sequencing of the *EFG1* locus in P37037 confirmed the heterozygous  
379 polymorphic site (G/A) in white populations whereas all assayed gray colonies (4/4) had  
380 become homozygous (A/A) to produce cells lacking functional *EFG1* (Fig. 5D).  
381 Consistent with previous observations of conversion to the gray state (13), gray sectors  
382 often arose within white colonies but no white sectors were observed within gray  
383 colonies.

384 We hypothesized that gray cells within the mixed population from P37037 may  
385 be responsible for resolving the ME8 network and, potentially, its association with  
386 growth. Indeed, transcriptional profiling of gray P37037 cells demonstrated significantly  
387 elevated expression of ME8 genes compared to the white state (Fig. [S10A](#)).  
388 Interestingly, only 9 of these 18 genes displayed differences in expression between  
389 white and gray cells in the SC5314 background (Fig. [S10B](#)), indicating that strain  
390 background also influences white v. gray expression profiles. To test the association  
391 between cell state and growth, the doubling time of P37037 white and gray cells was  
392 compared in multiple media types. White cells grew significantly faster than gray cells in  
393 both nutrient-rich (YPD, SCD) and nutrient-poor (minimal) media at 30°C (Students t-  
394 test;  $p < 0.001$ , Fig. 5E).

395 Three putative transcription factors in the ME8 module that had no previously  
396 described growth phenotypes (*KNS1*, *OFI1*, and *ZCF31*) were individually disrupted in  
397 strain P37037 to determine if genes within this module impact growth rates in either the  
398 white or gray cell state beyond the influence of cell state alone. Disruption of any of the  
399 three genes did not alter growth rates of white cells. In contrast, disruption of *OFI1*  
400 significantly decreased growth rates in the gray state, although doubling times were  
401 challenging to measure due to the lack of a clear logarithmic growth phase for these  
402 cells (Wilcoxon test;  $W(70)$ ,  $p = 0.017$ , Fig. 5F,G, [S11](#)). Loss of *KNS1* also decreased  
403 the growth rates of gray cells but this difference did not reach statistical significance  
404 (Fig. [S11](#)). Thus, genes in the ME8 module exhibit state-specific expression that reflects  
405 differences in growth between white/gray states.

406

#### 407 **Dissection of a novel network that regulate filamentation**

408 We also examined a second co-expression module, ME30, given that this  
409 module was associated with filamentation, but not growth rates, across a range of  
410 conditions (Fig. 5A). In contrast to ME8, this module displayed relatively low  
411 interconnectivity and exhibited a range of expression values across isolates (Fig. [S12A](#)).  
412 Expression of genes in the ME30 module was elevated in strains with higher  
413 filamentation scores compared to those that filament poorly (e.g., SC5314 v. P37037,  
414 respectively; Fig. 6A). ME30 genes included the previously characterized *BRG1* gene  
415 that encodes a transcriptional activator of filamentation (66), further suggesting a role  
416 for ME30 in promoting hyphal formation. Four genes from ME30 with potential  
417 regulatory roles (*UME7* – transcription factor, *FGR2* – putative transmembrane

418 transport, *PHO100* – putative phosphatase, and *orf19.6864* – putative ubiquitin ligase),  
419 in addition to *BRG1*, were disrupted in the high expression strain SC5314 and assessed  
420 for filamentation in liquid and on solid media. Loss of each gene reduced filamentation  
421 in liquid RPMI medium at one hour, when hyphal initiation begins in SC5314 (Fig. 6B).  
422 Thus, most cells in the  $\Delta/\Delta brg1$  background remained as yeast whereas loss of the  
423 other four ME30 genes produced a heterogeneous mix of yeast cells and cells forming  
424 germ tubes. After four hours in RPMI media, all ME30 mutant cultures contained mostly  
425 hyphae although significantly fewer filamentous cells were present in the  $\Delta/\Delta brg1$ ,  
426  $\Delta/\Delta fgr2$ ,  $\Delta/\Delta pho100$ , and  $\Delta/\Delta ume7$  strains (Wilcoxon test;  $p < 0.05$ , Fig 6B). Many of the  
427 mutants that formed filamentous cells remained as pseudohyphae at these later time  
428 points, compared to the wildtype background, which grew as a mix of hyphal and  
429 pseudohyphal cells (Fig. [S12B](#)). Complementation of each mutant restored the wildtype  
430 phenotype at both the one- and four-hour time points (Fig. 6B, [S12B](#)). Plating cells to  
431 single colonies on YPD and Spider media at 30°C produced similar outcomes with  
432 reduced filamentation of most ME30 mutants. Strains lacking *BRG1*, *FGR2*, and *UME7*  
433 demonstrated reduced colony filamentation after seven days on both YPD and Spider  
434 media with  $\Delta/\Delta pho100$  colonies also generating less filamentation on Spider medium  
435 (Wilcoxon test;  $p < 0.05$ , Fig. 6C). Similar to liquid filamentation, complementation of  
436 each mutant with a wildtype copy of the disrupted gene restored filamentation to  
437 wildtype levels (Fig. 6C). These results suggest that ME30 genes are responsible for  
438 activating filamentation responses in *C. albicans* and may be particularly important for  
439 hyphal initiation. Mutants in ME30 genes did not display any growth phenotypes,  
440 consistent with these defects being filamentation specific (Fig. 5A, [S12C](#)). Thus, our

441 collective experimental validation of phenotypes predicted to associate with co-  
442 expression modules demonstrates the power of this approach to define gene function  
443 across *C. albicans* strains and to link previously uncharacterized loci to biological  
444 processes important for disease.

445 **DISCUSSION**

446 A hallmark of *C. albicans* biology is the extensive genetic and phenotypic  
447 plasticity displayed among clinical isolates. This study expands previous observations  
448 that considerable transcriptional variation exists between natural isolates of the species  
449 (23, 27). We demonstrate that phylogenetic relationships between a set of 21 strains  
450 are not mirrored at the transcriptional level, as closely-related strains often display  
451 contrasting expression profiles under identical growth conditions. Notably, the  
452 construction of co-expression modules identified genes and pathways that underlie  
453 phenotypic differences between isolates. Furthermore, it permitted the direct evaluation  
454 of target genes for their roles in virulence-associated traits, thereby demonstrating the  
455 utility of this unbiased approach for delineating genes contributing to phenotypic  
456 diversity.

457 A striking finding in our analyses was the incongruence between constructed  
458 phylogenies and transcriptional profiles in *C. albicans*. Previous work has described  
459 transcriptional profiles in bacteria that reflect strain phylogeny and even phenotypic  
460 similarity based on shared lifestyle characteristics (68-70). In some eukaryotes such as  
461 *S. cerevisiae*, strong selective pressures based on niche specificity may explain  
462 incongruence between genetic and transcriptional profiles (34, 71). Here, we show that  
463 *C. albicans* strains express genes largely independent of their genetic similarity and that  
464 there is no clear association with the niche of isolation, although we recognize the  
465 limited number of multi-locus sequence type (MLST) clades represented by these  
466 isolates (7 of 17) as well as incomplete clinical information for these strains. The lack of  
467 a connection between genotype and gene expression is highlighted by the prevalence

468 of strain-specific expression patterns for several isolates. This indicates that phenotypic  
469 variation between *C. albicans* isolates arises, in large part, from transcriptional  
470 differences that cannot be simply predicted by genetic phylogenies or clinical correlates.

471         Transcriptional differences among the 21 *C. albicans* isolates provided new  
472 insights into functional variation between isolates. Genes involved in metabolic  
473 processes were often differentially expressed among strains and may contribute to the  
474 range of growth rates seen for these isolates (11). Genes regulating transcriptional  
475 activation and hyphae formation also showed variable expression and were linked to  
476 differences in growth rates and filamentation, respectively. This is despite the fact that  
477 all expression profiling involved cells grown in a single culture condition (replete media  
478 at 30°C). Why might cells grown under one condition reflect expression differences that  
479 affect function in another? One possibility is that strains express genes in preparation  
480 for exposure to a new environment. Such priming can result from epigenetic  
481 reprogramming following a previous exposure (72), stochastic expression of regulators  
482 that promote bet hedging (73), and/or chromatin remodeling that favors activation of  
483 certain promoters (74). Priming of *C. albicans* cells could promote population fitness  
484 during environmental shifts including transitions between different host niches (75). *C.*  
485 *albicans* strains may also contain subpopulations of cells with distinct expression  
486 profiles that favor alternative environmental conditions, with the fraction of these  
487 subpopulations varying between strains. Additionally, cell variation in a population can  
488 arise due to changes in transcription factor binding that will disproportionately affect  
489 gene expression but will not cause general fitness defects (76). Single cell analysis and

490 transcriptional profiling of large strain sets grown in multiple environmental conditions  
491 will help differentiate between these possibilities.

492 Our expression analysis of the set of 21 *C. albicans* strains facilitated the  
493 construction of a gene expression map of the species and the incorporation of a large  
494 proportion of uncharacterized loci into co-expression clusters linked to putative  
495 functions. Similar approaches in other systems have revealed the function of  
496 uncharacterized genes and their contributions to complex phenotypes (77-79).  
497 However, previous systems-level analyses have often skirted direct molecular testing of  
498 predicted gene functions. Here, experimental tests of *C. albicans* genes associated with  
499 growth and filamentation revealed functional roles for cell state and transcriptional  
500 regulators linked to two co-expression modules, ME8 and ME30. Analysis of genomic  
501 sequences could not predict the results described here as no inactivating mutations are  
502 present within ME8 and ME30 genetic alleles assayed in our strain set (11). Our study  
503 therefore reveals how expression profiling allows for an analysis of genotype-phenotype  
504 relationships using a variety of gene expression models instead of only assessing  
505 discrete mutation types.

506 Expression of ME8 module genes were linked to the gray cell state, which was  
507 recently shown to arise due to mutations that abolish *EFG1* function (13). The *EFG1*  
508 locus is heterozygous in P37037 and loss of heterozygosity (LOH) events can therefore  
509 cause cells to become *efg1* null and adopt the gray state (13). Unexpectedly, our  
510 analysis identified ME8 as a gray-specific co-expression module in P37037, where gray  
511 cells grow more slowly than white cells and which produced the expression module-  
512 phenotype association. ME8 genes that are upregulated in P37037 gray cells versus



513 white cells are not uniformly upregulated in SC5314 gray cells (Fig. [S10B](#)). These  
514 results further emphasize that *C. albicans* phenotypes and expression profiles are  
515 dependent on their genetic background (11, 23, 26, 27). The existence of an *EFG1*  
516 heterozygote capable of accessing the gray state is not particularly uncommon (~2% of  
517 assayed clinical isolates) and this hemizygous state may reflect advantages in gray  
518 state colonization of the gut or oral cavity compared to white cells (13, 15). Reduced  
519 growth rates of gray cells compared to white state cells in our assays could reflect  
520 differences from conditions in the host or, more simply, differences between genetic  
521 backgrounds. We evaluated the phenotypic consequences of deleting three genes from  
522 the highly interconnected ME8 module and showed that loss of *OF1* significantly  
523 reduced the growth rates of P37037 gray cells. Thus, we uncovered a novel factor with  
524 a cell state-specific phenotype which further validated our approach.

525         A functional dissection of the ME30 module similarly connected several poorly  
526 characterized genes to a key phenotype in *C. albicans*. In this case, novel regulators of  
527 filamentation were discovered despite the wealth of research into filamentation  
528 pathways in this species (21, 80-82). Most studies have focused on genetic dissection  
529 of filamentation in SC5314 and have relied on candidate gene or transcriptional profiling  
530 approaches. We note that our identification of ME30 genes as regulators of  
531 filamentation did not rely on the presence of ORF-inactivating mutations but on  
532 differential expression across isolates that correlated with filamentation responses.  
533 Inclusion of the well-characterized filamentation regulator *BRG1* (66) emphasized the  
534 potential for other ME30 genes to regulate filamentation. Indeed, all assayed genes in  
535 ME30 appear to promote this process, albeit to different degrees, which likely reflects

536 the lack of highly interconnected expression within this module (Fig. [S12](#)). All mutants of  
537 ME30 genes disrupted hyphal formation at early time points suggesting that these  
538 genes play a critical function in hyphal initiation and operate across multiple conditions,  
539 even though the ME30 module was defined using cells grown in the yeast form. The  
540 priming of filamentation via ME30 genes is supported by defined roles for Brg1 in  
541 recruiting Hda1, a histone deacetylase that remodels chromatin at the promoters of  
542 hyphae-specific genes, and occludes Nrg1, a negative regulator of filamentation (66,  
543 83). Elevated expression of *BRG1* during rich medium growth could reduce the  
544 activation time needed to transcribe *UME6* and other genes that promote filamentation,  
545 while maintaining a phenotypically yeast state. The particularly long 5' UTR of *BRG1*  
546 may indicate complex regulation of this gene, including undefined molecular pathways  
547 that include other ME30 genes, especially those with clear regulatory capacities (e.g.,  
548 *FGR2*, *PHO100*, *UME7*) (54, 84). Thus, our study indicates that ME30 module genes  
549 may play broad roles in the regulation of filamentation in *C. albicans*.

550

551

552 **METHODS**

553 **Media and reagents**

554 Yeast extract peptone dextrose (YPD) and synthetic complete dextrose (SCD) media  
555 were prepared as previously described (85). Spider medium was prepared (1% nutrient  
556 broth, 1% mannitol, 0.2% K<sub>2</sub>HPO<sub>4</sub>) and equilibrated to a pH of 7.4. Minimal medium was  
557 prepared as 0.17% yeast nitrogen base, 0.5% ammonium sulfate. YPD containing 200  
558 µg/mL nourseothricin (Werner Bioagents, Jena, Germany) was used to select for  
559 nourseothricin resistant (NAT<sup>R</sup>) strains.

560 **RNA-Seq library preparation**

561 Two independent cultures for each of the 21 clinical isolates were grown at 30°C in YPD  
562 overnight. Cultures were diluted 1:100 into fresh YPD and allowed to grow to an OD of  
563 1.0. RNA was harvested from cells using a Masterpure Yeast RNA Purification kit  
564 (Epicentre, Madison, WI) and treated with DNaseI (Fisher Scientific, Hampton, NH).  
565 RNA quality was measured on an Agilent 2100 Bioanalyzer and RNA with RIN scores  
566 ≥7.5 used for constructions of sequencing libraries.  
567 Poly-A RNA was isolated and used to construct strand-specific libraries using the dUTP  
568 second strand marking method (86, 87) as previously described (88). The 42  
569 sequencing libraries were pooled and sequenced on the Illumina HiSeq to generate 151  
570 base paired-end reads. To measure gene expression, reads were aligned to the *C.*  
571 *albicans* SC5314 reference genome. RNA-Seq reads were then mapped to the  
572 transcripts with STAR (version 2.0.9) (89). Count tables were generated with HTSeq  
573 (version 0.9.0 (90), and differentially expressed genes were identified using EdgeR

574 (version 3.28.1) (91). RNA-Seq data is available online and links are provided in Table  
575 S11.

### 576 **FASTQ Processing and alignments**

577       Sequenced reads were returned in FASTQ format, and quality score confirmed  
578 using FastQC. All 42 samples exceeded the minimum allowed Phred quality score (28)  
579 across all bases. An average of 8.1 million reads were obtained per samples. Reads  
580 were aligned using the Spliced Transcripts Alignment to a Reference (STAR) with the  
581 alignIntronMin and alignIntronMax parameters set to 30 and 1000 (92). Greater than  
582 90% of reads mapped to defined genes (range 96-98%). All other parameters were  
583 executed with default values. For each gene, the number of aligned reads was  
584 calculated using htseq-count (90). Gene features were defined as those exon regions  
585 annotated in the SC5314 Assembly 21 features file (<http://shorturl.at/hpGW3>), for a total of  
586 6468 features. These read counts per feature were normalized into TPM values, which  
587 can be publicly accessed here: <https://goo.gl/PqgGtH>. The RNA-sequencing library  
588 contained a known defect with strand orientation, where orientation was incorrectly  
589 denoted as opposite of actual designation. All analyses (including features count) had  
590 taken this into account and corrected for it prior to analysis.

### 591 **Hierarchical clustering of gene expression**

592       TPM values for all *C. albicans* genome features from the Assembly 21 genome  
593 feature file were used to build dendrograms of similar gene expression. Hierarchical  
594 clustering was performed using Spearman's correlation and average linkage. To  
595 assess, similarity between biological duplicates trees were built and tested with 1000  
596 bootstraps using the 'pvclust' package (version 2.2-0) in R (version 3.5.3). For

597 comparisons across strains, average TPM values were calculated between strains and  
598 hierarchical clustering performed.

### 599 **Correlation of expression with strain phylogeny**

600 Phylogenetic relatedness among the 21 clinical isolates focused on strains that  
601 clustered well within their respective canonical clusters (I, II, III, SA). To increase the  
602 tightness of these well-represented clusters, outlier strains with long-branch lengths  
603 (P94015, P60002, and P75010) were removed. Based on each gene's individual  
604 transcriptomic profile, we performed unsupervised clustering on each gene's expression  
605 for the remaining 18 strains to bin into 4 groups using the R library kmeans. Hierarchical  
606 clustering was then performed on those genes for which these 4 groups contained at  
607 least half of the expected strains organized the same as for whole genome analysis. For  
608 each gene's hierarchical clustering, the number of strains inconsistently assigned were  
609 counted and only 31 genes had at most six incorrectly assigned strains, less than  
610 expected by chance. No gene reported perfect homology with the phylogenetic tree.

### 611 **5' UTR and 3' UTR construction**

612 The aligned reads in bam file formats for each of the 42 replicates was converted into  
613 bed format using [bamToBed](#), such that each individually aligned read is denoted in  
614 each row. Next, [mergeBed](#) was applied so that overlapping reads on the same strand  
615 are merged together into one contiguous segment. [IntersectBed](#) was used to annotate  
616 the respective gene contained with each overlapping segment, with a minimum overlap  
617 of 1 bp. The -S flag was used when running [intersectBed](#) to account for opposite strand  
618 orientation. Continuous merged reads that overlap with more than one gene feature and  
619 those with negative UTR lengths were removed.

620 **Differential gene expression by phenotypic extremes**

621 Previous phenotyping of these 21 was used as the basis for this analysis (11). For each  
622 phenotype with categorical extremes, both biological replicates for strains exhibiting  
623 traits at the extremes of the distribution for each phenotype were binned into opposing  
624 groups and compared against each other for differentially expressed genes as  
625 described above using EdgeR (91). The following groupings were used for each  
626 phenotypic comparison:

- 627 a) SCD30°C: P60002, P78048, P37037 vs GC75, P75063, P34048 (slow vs fast)
- 628 b) YPD30°C: P76067, P94015 vs P34048, SC5314, P75016, GC75, P57055 (slow vs fast)
- 629 c) Biofilms: GC75, P87, SC5314 vs P75016, P94015, P57072, P75010 (heavy vs light)
- 630 d) FilamentationScoreSpider30: P75016, P78042, 12C, P37005 vs GC75, P94015,  
631 P34048, P37037 (high vs low)
- 632 e) CalcofluorWhite: GC75, P75016, P75063, P60002, P75010, 19F, L26, P37039, 12C,  
633 P78048, SC5314 vs P34048, P57055, P57072, P76055, P76067 (colonies at 4<sup>th</sup> dilution  
634 versus the 1<sup>st</sup> dilution)
- 635 f) HydrogenPeroxide: P75016, P75063, P87, P60002 vs P94015, P78042, P57055  
636 (colonies at 4<sup>th</sup> dilution versus none at any dilution)
- 637 g) GenomeHeterozygosity: P75016, P34048, P78042, P78048, SC5314 vs P87, P94015  
638 (high vs low)

639 Differentially expressed genes were filtered for a minimum  $\log_2$  fold change of 2, a  
640 qValue less than or equal to 0.05, and included only genes that had a minimum of 1  
641 count per million reads in at least two samples. The expression dataset was normalized  
642 using the default weighted trimmed mean of M-values (TMM) method and dispersion

643 estimated using an empirical Bayes method. Because all replicates were collected and  
644 sequenced in a single experimental run, no batch effect is expected.

### 645 **Gene ontology annotation**

646 Enrichment for gene ontology terms was conducted through the Candida Genome  
647 Database (93). In complement, we introduce an R library ([CAlbicansR](#)) to facilitate non-  
648 browser analysis of *Candida* genomic datasets. Its functionality includes an offline  
649 database for converting orf19 identifiers into gene names, and vice versa. In addition,  
650 the library also provides a function for automated searches of the Gene Ontology Term  
651 Finder. Results are outputted into the R console.

### 652 **Linear regression of phenotype on gene expression**

653 The strength of a linear association between a gene's expression and phenotypic score  
654 was assessed for all genes in all phenotypes using each sequencing set as a single  
655 data point (42 data points in all). To account for existing phylogenetic relationships, the  
656 covariance structure between strains was calculated based a Brownian motion process  
657 of evolution, using the R phytools package. Phylogenetic generalized least square  
658 regression was fitted while accounting for within-group correlation structure as defined  
659 previously. For each gene, the x-axis represented the strain's expression of that gene  
660 and the y-axis indicated the corresponding strain's phenotype score, and a linear least-  
661 squares equation was calculated. The F-statistic was used to assess statistical  
662 significance, with a Bonferroni correction applied to each set of phenotype tests. Only  
663 genes with a corrected p-value less than 0.05 were retained.

### 664 **WGCNA construction**

665 The recommended default settings were used from the [tutorial](#) section 2.a.2 for  
666 WGCNA of all 42 sequenced samples (2 replicates each from 21 isolates). Specifically,  
667 beta was set to 20 to achieve scale-free topology (first value for which  $R_2$  exceeded  
668 0.80) as recommended (94). In addition, the networkType and TOMType both were set  
669 to signed, minModuleSize at 10, and mergeCutHeight at 0.15.

#### 670 **Identification of bimodal networks**

671 To identify genes with expression values that follow a multimodal distribution, we used a  
672 [Gap Statistic](#) method implemented through the R library [clusGap](#), and used [hclust](#) to  
673 identify clusters. Only genes with minimum expression values were considered (TPM  $\geq$   
674 5). A gene was considered to operate via a bimodal response if its maximized gap  
675 statistic exceeded 0.9 and corresponding k value exceeded a minimum of 2.  
676 Specifically, this analysis identified a subset of genes within ME8 that express  
677 significantly higher only in P37037.

#### 678 **Strain and plasmid construction**

679 Strains, oligonucleotides, and plasmids described in this paper are provided in  
680 Tables [S16](#), [S17](#), and [S18](#), respectively. Gene disruption was performed using long  
681 oligonucleotide-mediated targeting of *OFI1*, *ZCF31*, and *KNS1* in P37037 through  
682 amplification of the *SAT1-FLP* cassette from pSFS2A (deletion oligonucleotides listed in  
683 pairs as “Round 1 KO” or “Round 2 KO” in Table [S17](#)) and integrated by lithium acetate  
684 transformation (95, 96). Integration of deletion cassettes (Deletion Chk) and  
685 complementation plasmids (Addback Chk), as well as the presence or absence of open  
686 reading frames for each gene (ORF Chk), were confirmed with PCR using the  
687 oligonucleotides listed in Table [S17](#). The *SAT1-FLP* cassette was recycled by plating to



688 100 colonies on yeast extract peptone maltose (YPM) solid media top-spread with either  
689 10  $\mu\text{g}/\text{mL}$  or 20  $\mu\text{g}/\text{mL}$  NAT. Small colonies were then patched to YPD with or without  
690 200  $\mu\text{g}/\text{mL}$  NAT to screen for nourseothricin sensitive (NAT<sup>S</sup>) colonies.

691 Construction of the *OFI1* complementation plasmid p41 was performed by  
692 cloning PCR amplified *OFI1* from P37037 genomic DNA (including the promoter, coding  
693 sequence, and downstream) into pSFS2A using restriction enzymes *Apal* and *BamHI*.  
694 The resulting plasmid was linearized in the promoter of *OFI1* using *HpaI* for  
695 transformation into *C. albicans*. Construction of plasmids p50, p52, and p53 were  
696 performed using gap-repair cloning as described in *Jacobus et al.*, (97) to generate  
697 *ZCF31\_A*, *ZCF31\_B*, and *KNS1* complementation plasmids, respectively. Briefly,  
698 *ZCF31* from P37037 genomic DNA (including the promoter, coding sequence, and  
699 downstream) was PCR amplified with oligonucleotides encoding 20 bp ends  
700 homologous to pSFS2A, and pSFS2a was linearized via PCR amplification with  
701 oligonucleotides containing 20 bp of homology to *ZCF31*, generating 40 bp of overlap.  
702 After digestion of residual plasmid template using *DpnI*, each PCR product was gel  
703 purified and co-transformed into chemically-competent DH5 $\alpha$  to be assembled into an  
704 intact plasmid. The resulting plasmids yielded two plasmids containing different *ZCF31*  
705 alleles listed as p50 (*ZCF31*<sub>-P37037\_A</sub>) and p52 (*ZCF31*<sub>-P37037\_B</sub>). p50 and p52 were  
706 linearized in the promoter of *ZCF31* using *PacI* for lithium acetate transformation into *C.*  
707 *albicans*. The *KNS1* complementation plasmid p53 was generated in a similar manner,  
708 but the genomic amplification was split into two fragments to introduce a novel *MluI*  
709 restriction site into the promoter region. p53 was linearized in the promoter of *KNS1*  
710 using *MluI* for *C. albicans* transformation.

711 Pure populations of P37037 white and gray state cells were isolated from the  
712 mixed P37037 stock by streaking MAY3 onto YPD and growing at 30°C for 5 days until  
713 individual white and gray colonies could be differentiated. Independent colonies were  
714 inoculated into liquid YPD and grown overnight at 30°C for storage and sequencing of  
715 *EFG1* to determine the allelic makeup of this locus.

716 Gray state cells from P37037-derived mutant strains were obtained by streaking  
717 white state strains onto YPD, followed by growth at room temperature. After five days of  
718 growth, gray sectors were identified and struck out onto YPD and grown at room  
719 temperature once again to obtain isolated gray state colonies. After three days of  
720 growth, streaks were examined at a cellular and colony level to confirm gray state  
721 morphologies.

722 CRISPR-mediated deletion of SC5314 *BRG1*, *UME7*, *orf19.6864*, *PHO100*, and  
723 *FGR2* were performed as previously described using a modified lithium acetate  
724 transformation protocol (98). Colonies were screened for gene deletions by PCR for the  
725 presence of a band using oligonucleotides flanking the excised locus (Up/Dwn Check)  
726 and for the loss of the target gene (ORF Chk) using the oligonucleotides listed in Table  
727 [S17](#).

728 Complementation plasmids for *BRG1*, *UME7*, *orf19.6864*, *PHO100*, and *FGR2*  
729 mutants were constructed by amplifying the wildtype locus from the background strains  
730 for all CRISPR-based deletions using primers listed in Table [S17](#) and cloning them into  
731 pSFS2a as described above using gap repair cloning. All genes were cloned in two  
732 pieces with the exception of *UME7*, which required a three-piece cloning to include a  
733 MluI site for linearization prior to transformation (plasmids listed in Table [S18](#)). Genes

734 were confirmed to be identical to the expected sequence by Sanger sequencing and  
735 then linearized using *PacI*, *MluI*, *PacI*, *AgeI*, and *CspCI* for *BRG1*, *UME7*, *orf19.6864*,  
736 *PHO100*, and *FGR2*, respectively, for lithium acetate transformation. Cells were  
737 selected on 200  $\mu\text{g/mL}$  NAT and confirmed to contain the gene integrated at the native  
738 locus by PCR using primers listed in Table [S17](#).

### 739 **Filamentation**

740 For liquid filamentation assays, cells were grown overnight in YPD at 30°C.  
741 Cultures the next day were spun down, washed in PBS, and inoculated 1:100 into RPMI  
742 1640 liquid medium and allowed to grow for either 1 or 4 hours before imaging. Images  
743 were captured at 40x magnification across 6 fields of view per sample to include at least  
744 50 cells. At least four biological replicates were performed per genotype.

745 For solid media filamentation, cells were taken from YPD solid medium, counted  
746 by hemocytometer, and plated to Spider or YPD at 100 cells per plate. Plates were  
747 incubated at 30°C for seven days and imaged. Filamentation was measured using  
748 MIPAR as previously described (99). At least six biological replicates were performed  
749 per genotype.

### 750 **Data availability**

751 The datasets generated during and/or analysed during the current study are  
752 available from the corresponding author on reasonable request. The transcriptional  
753 profiling data generated in this study have been submitted to the NCBI BioProject  
754 database (<https://www.ncbi.nlm.nih.gov/bioproject/>) under accession number  
755 PRJNA630085. Tools developed to aid in gene ontology analysis are available from  
756 <https://github.com/joshuamwang/CAIbicansR>.

757

758 **FUNDING**

759 This work was supported by National Institutes of Health grants R01AI148788 to M.Z.A.  
760 and R01AI141893/R01AI081704 to R.J.B. R.J.F. was supported by an NIH F31  
761 fellowship (1F31DE029409-01). This work was also supported by the American Heart  
762 Association grant AHA 20PRE35200201, M.J.D. 2020.

763

764 **ACKNOWLEDGEMENTS**

765 We thank the entire Anderson lab for helpful discussions and feedback during the  
766 production of this work. We also than the lab of Dr. Chad Rappleye for comments and  
767 critique of this work and Drs. Kou-San Ju, Christina Cuomo, and Lara Sucheston-  
768 Campbell for feedback on network analysis and visualization.

769 **REFERENCES**

- 770
- 771 1. **Neville BA, d'Enfert C, Bournoux ME.** 2015. *Candida albicans* commensalism in the
- 772 gastrointestinal tract. *FEMS Yeast Res* **15**.
- 773 2. **Horn DL, Neofytos D, Anaissie EJ, Fishman JA, Steinbach WJ, Olyaei AJ, Marr KA, Pfaller MA,**
- 774 **Chang CH, Webster KM.** 2009. Epidemiology and outcomes of candidemia in 2019 patients: data
- 775 from the prospective antifungal therapy alliance registry. *Clin Infect Dis* **48**:1695-1703.
- 776 3. **Yapar N.** 2014. Epidemiology and risk factors for invasive candidiasis. *Ther Clin Risk Manag*
- 777 **10**:95-105.
- 778 4. **Danhof HA, Vylkova S, Vesely EM, Ford AE, Gonzalez-Garay M, Lorenz MC.** 2016. Robust
- 779 Extracellular pH Modulation by *Candida albicans* during Growth in Carboxylic Acids. *MBio* **7**.
- 780 5. **Ene IV, Cheng SC, Netea MG, Brown AJ.** 2013. Growth of *Candida albicans* cells on the
- 781 physiologically relevant carbon source lactate affects their recognition and phagocytosis by
- 782 immune cells. *Infect Immun* **81**:238-248.
- 783 6. **Zeuthen ML, Howard DH.** 1989. Thermotolerance and the heat-shock response in *Candida*
- 784 *albicans*. *J Gen Microbiol* **135**:2509-2518.
- 785 7. **Odds FC, Bournoux ME, Shaw DJ, Bain JM, Davidson AD, Diogo D, Jacobsen MD, Lecomte M, Li**
- 786 **SY, Tavanti A, Maiden MC, Gow NA, d'Enfert C.** 2007. Molecular phylogenetics of *Candida*
- 787 *albicans*. *Eukaryot Cell* **6**:1041-1052.
- 788 8. **Lott TJ, Holloway BP, Logan DA, Fundyga R, Arnold J.** 1999. Towards understanding the
- 789 evolution of the human commensal yeast *Candida albicans*. *Microbiology* **145 ( Pt 5)**:1137-1143.
- 790 9. **Schmid J, Herd S, Hunter PR, Cannon RD, Yasin MS, Samad S, Carr M, Parr D, McKinney W,**
- 791 **Schousboe M, Harris B, Ikram R, Harris M, Restrepo A, Hoyos G, Singh KP.** 1999. Evidence for a
- 792 general-purpose genotype in *Candida albicans*, highly prevalent in multiple geographical regions,
- 793 patient types and types of infection. *Microbiology* **145 ( Pt 9)**:2405-2413.
- 794 10. **Ropars J, Maufrais C, Diogo D, Marcet-Houben M, Perin A, Sertour N, Mosca K, Permal E, Laval**
- 795 **G, Bouchier C, Ma L, Schwartz K, Voelz K, May RC, Poulain J, Battail C, Wincker P, Borman AM,**
- 796 **Chowdhary A, Fan S, Kim SH, Le Pape P, Romeo O, Shin JH, Gabaldon T, Sherlock G, Bournoux**
- 797 **ME, d'Enfert C.** 2018. Gene flow contributes to diversification of the major fungal pathogen
- 798 *Candida albicans*. *Nat Commun* **9**:2253.
- 799 11. **Hirakawa MP, Martinez DA, Sakthikumar S, Anderson MZ, Berlin A, Gujja S, Zeng Q, Zisson E,**
- 800 **Wang JM, Greenberg JM, Berman J, Bennett RJ, Cuomo CA.** 2015. Genetic and phenotypic
- 801 intra-species variation in *Candida albicans*. *Genome Res* **25**:413-425.
- 802 12. **Wang JM, Bennett RJ, Anderson MZ.** 2018. The Genome of the Human Pathogen *Candida*
- 803 *albicans* Is Shaped by Mutation and Cryptic Sexual Recombination. *MBio* **9**.
- 804 13. **Liang SH, Anderson MZ, Hirakawa MP, Wang JM, Frazer C, Alaalm LM, Thomson GJ, Ene IV,**
- 805 **Bennett RJ.** 2019. Hemizygoty Enables a Mutational Transition Governing Fungal Virulence and
- 806 Commensalism. *Cell Host Microbe* **25**:418-431 e416.
- 807 14. **Pande K, Chen C, Noble SM.** 2013. Passage through the mammalian gut triggers a phenotypic
- 808 switch that promotes *Candida albicans* commensalism. *Nat Genet* **45**:1088-1091.
- 809 15. **Tao L, Du H, Guan G, Dai Y, Nobile CJ, Liang W, Cao C, Zhang Q, Zhong J, Huang G.** 2014.
- 810 Discovery of a "white-gray-opaque" tristable phenotypic switching system in *Candida albicans*:
- 811 roles of non-genetic diversity in host adaptation. *PLoS Biol* **12**:e1001830.
- 812 16. **Takagi J, Singh-Babak SD, Lohse MB, Dalal CK, Johnson AD.** 2019. *Candida albicans* white and
- 813 opaque cells exhibit distinct spectra of organ colonization in mouse models of infection. *PLoS*
- 814 *One* **14**:e0218037.
- 815 17. **Moyes DL, Runglall M, Murciano C, Shen C, Nayar D, Thavaraj S, Kohli A, Islam A, Mora-**
- 816 **Montes H, Challacombe SJ, Naglik JR.** 2010. A biphasic innate immune MAPK response

- 817 discriminates between the yeast and hyphal forms of *Candida albicans* in epithelial cells. *Cell*  
818 *Host Microbe* **8**:225-235.
- 819 18. **Xie J, Tao L, Nobile CJ, Tong Y, Guan G, Sun Y, Cao C, Hernday AD, Johnson AD, Zhang L, Bai FY,**  
820 **Huang G.** 2013. White-opaque switching in natural MTL $\alpha$ /alpha isolates of *Candida albicans*:  
821 evolutionary implications for roles in host adaptation, pathogenesis, and sex. *PLoS Biol*  
822 **11**:e1001525.
- 823 19. **Peters BM, Palmer GE, Nash AK, Lilly EA, Fidel PL, Jr., Noverr MC.** 2014. Fungal morphogenetic  
824 pathways are required for the hallmark inflammatory response during *Candida albicans*  
825 vaginitis. *Infect Immun* **82**:532-543.
- 826 20. **Solis NV, Park YN, Swidergall M, Daniels KJ, Filler SG, Soll DR.** 2018. *Candida albicans* White-  
827 Opaque Switching Influences Virulence but Not Mating during Oropharyngeal Candidiasis. *Infect*  
828 *Immun* **86**.
- 829 21. **Noble SM, Gianetti BA, Witchley JN.** 2017. *Candida albicans* cell-type switching and functional  
830 plasticity in the mammalian host. *Nat Rev Microbiol* **15**:96-108.
- 831 22. **Soll DR, Pujol C.** 2003. *Candida albicans* clades. *FEMS Immunol Med Microbiol* **39**:1-7.
- 832 23. **MacCallum DM, Castillo L, Nather K, Munro CA, Brown AJ, Gow NA, Odds FC.** 2009. Property  
833 differences among the four major *Candida albicans* strain clades. *Eukaryot Cell* **8**:373-387.
- 834 24. **Pujol C, Pfaller MA, Soll DR.** 2004. Flucytosine resistance is restricted to a single genetic clade of  
835 *Candida albicans*. *Antimicrob Agents Chemother* **48**:262-266.
- 836 25. **Dodgson AR, Dodgson KJ, Pujol C, Pfaller MA, Soll DR.** 2004. Clade-specific flucytosine  
837 resistance is due to a single nucleotide change in the *FUR1* gene of *Candida albicans*. *Antimicrob*  
838 *Agents Chemother* **48**:2223-2227.
- 839 26. **Wu W, Lockhart SR, Pujol C, Srikantha T, Soll DR.** 2007. Heterozygosity of genes on the sex  
840 chromosome regulates *Candida albicans* virulence. *Mol Microbiol* **64**:1587-1604.
- 841 27. **Huang MY, Woolford CA, May G, McManus CJ, Mitchell AP.** 2019. Circuit diversification in a  
842 biofilm regulatory network. *PLoS Pathog* **15**:e1007787.
- 843 28. **Li X, Yan Z, Xu J.** 2003. Quantitative variation of biofilms among strains in natural populations of  
844 *Candida albicans*. *Microbiology* **149**:353-362.
- 845 29. **Goberna M, Verdu M.** 2016. Predicting microbial traits with phylogenies. *ISME J* **10**:959-967.
- 846 30. **Raes J, Letunic I, Yamada T, Jensen LJ, Bork P.** 2011. Toward molecular trait-based ecology  
847 through integration of biogeochemical, geographical and metagenomic data. *Mol Syst Biol*  
848 **7**:473.
- 849 31. **Obenauer JC, Denson J, Mehta PK, Su X, Mukatira S, Finkelstein DB, Xu X, Wang J, Ma J, Fan Y,**  
850 **Rakestraw KM, Webster RG, Hoffmann E, Krauss S, Zheng J, Zhang Z, Naeve CW.** 2006. Large-  
851 scale sequence analysis of avian influenza isolates. *Science* **311**:1576-1580.
- 852 32. **Dufour YS, Gillet S, Frankel NW, Weibel DB, Emonet T.** 2016. Direct Correlation between Motile  
853 Behavior and Protein Abundance in Single Cells. *PLoS Comput Biol* **12**:e1005041.
- 854 33. **Skelly DA, Merrihew GE, Riffle M, Connelly CF, Kerr EO, Johansson M, Jaschob D, Graczyk B,**  
855 **Shulman NJ, Wakefield J, Cooper SJ, Fields S, Noble WS, Muller EG, Davis TN, Dunham MJ,**  
856 **Maccoss MJ, Akey JM.** 2013. Integrative phenomics reveals insight into the structure of  
857 phenotypic diversity in budding yeast. *Genome Res* **23**:1496-1504.
- 858 34. **Kvitek DJ, Will JL, Gasch AP.** 2008. Variations in stress sensitivity and genomic expression in  
859 diverse *S. cerevisiae* isolates. *PLoS Genet* **4**:e1000223.
- 860 35. **Bruno VM, Wang Z, Marjani SL, Euskirchen GM, Martin J, Sherlock G, Snyder M.** 2010.  
861 Comprehensive annotation of the transcriptome of the human fungal pathogen *Candida*  
862 *albicans* using RNA-seq. *Genome Res* **20**:1451-1458.

- 863 36. **Tuch BB, Mitrovich QM, Homann OR, Hernday AD, Monighetti CK, De La Vega FM, Johnson**  
864 **AD.** 2010. The transcriptomes of two heritable cell types illuminate the circuit governing their  
865 differentiation. *PLoS Genet* **6**:e1001070.
- 866 37. **Niemiec MJ, Grumaz C, Ermert D, Desel C, Shankar M, Lopes JP, Mills IG, Stevens P, Sohn K,**  
867 **Urban CF.** 2017. Dual transcriptome of the immediate neutrophil and *Candida albicans* interplay.  
868 *BMC Genomics* **18**:696.
- 869 38. **Lorenz MC, Bender JA, Fink GR.** 2004. Transcriptional response of *Candida albicans* upon  
870 internalization by macrophages. *Eukaryot Cell* **3**:1076-1087.
- 871 39. **Sellam A, van het Hoog M, Tebbji F, Beaurepaire C, Whiteway M, Nantel A.** 2014. Modeling the  
872 transcriptional regulatory network that controls the early hypoxic response in *Candida albicans*.  
873 *Eukaryot Cell* **13**:675-690.
- 874 40. **Munoz JF, Delorey T, Ford CB, Li BY, Thompson DA, Rao RP, Cuomo CA.** 2019. Coordinated  
875 host-pathogen transcriptional dynamics revealed using sorted subpopulations and single  
876 macrophages infected with *Candida albicans*. *Nat Commun* **10**:1607.
- 877 41. **Amorim-Vaz S, Tran Vdu T, Pradervand S, Pagni M, Coste AT, Sanglard D.** 2015. RNA  
878 Enrichment Method for Quantitative Transcriptional Analysis of Pathogens In Vivo Applied to  
879 the Fungus *Candida albicans*. *MBio* **6**:e00942-00915.
- 880 42. **Bruno VM, Shetty AC, Yano J, Fidel PL, Jr., Noverr MC, Peters BM.** 2015. Transcriptomic analysis  
881 of vulvovaginal candidiasis identifies a role for the NLRP3 inflammasome. *MBio* **6**.
- 882 43. **Xu W, Solis NV, Ehrlich RL, Woolford CA, Filler SG, Mitchell AP.** 2015. Activation and alliance of  
883 regulatory pathways in *C. albicans* during mammalian infection. *PLoS Biol* **13**:e1002076.
- 884 44. **Wang T, Xiu J, Zhang Y, Wu J, Ma X, Wang Y, Guo G, Shang X.** 2017. Transcriptional Responses  
885 of *Candida albicans* to Antimicrobial Peptide MAF-1A. *Front Microbiol* **8**:894.
- 886 45. **Szabo K, Jakab A, Poliska S, Petrenyi K, Kovacs K, Issa LHB, Emri T, Pocsí I, Dombradi V.** 2019.  
887 Deletion of the fungus specific protein phosphatase Z1 exaggerates the oxidative stress  
888 response in *Candida albicans*. *BMC Genomics* **20**:873.
- 889 46. **McCall AD, Kumar R, Edgerton M.** 2018. *Candida albicans* Sfl1/Sfl2 regulatory network drives  
890 the formation of pathogenic microcolonies. *PLoS Pathog* **14**:e1007316.
- 891 47. **Nobile CJ, Fox EP, Nett JE, Sorrells TR, Mitrovich QM, Hernday AD, Tuch BB, Andes DR, Johnson**  
892 **AD.** 2012. A recently evolved transcriptional network controls biofilm development in *Candida*  
893 *albicans*. *Cell* **148**:126-138.
- 894 48. **Hernday AD, Lohse MB, Nobile CJ, Noiman L, Laksana CN, Johnson AD.** 2016. Ssn6 Defines a  
895 New Level of Regulation of White-Opaque Switching in *Candida albicans* and Is Required For the  
896 Stochasticity of the Switch. *MBio* **7**:e01565-01515.
- 897 49. **Lohse MB, Johnson AD.** 2016. Identification and Characterization of Wor4, a New  
898 Transcriptional Regulator of White-Opaque Switching. *G3 (Bethesda)* **6**:721-729.
- 899 50. **Glazier VE, Murante T, Murante D, Koselny K, Liu Y, Kim D, Koo H, Krysan DJ.** 2017. Genetic  
900 analysis of the *Candida albicans* biofilm transcription factor network using simple and complex  
901 haploinsufficiency. *PLoS Genet* **13**:e1006948.
- 902 51. **Fox EP, Bui CK, Nett JE, Hartooni N, Mui MC, Andes DR, Nobile CJ, Johnson AD.** 2015. An  
903 expanded regulatory network temporally controls *Candida albicans* biofilm formation. *Mol*  
904 *Microbiol* **96**:1226-1239.
- 905 52. **Desai PR, Lengeler K, Kapitan M, Janssen SM, Alepuz P, Jacobsen ID, Ernst JF.** 2018. The 5'  
906 Untranslated Region of the EFG1 Transcript Promotes Its Translation To Regulate Hyphal  
907 Morphogenesis in *Candida albicans*. *mSphere* **3**.
- 908 53. **Guan Z, Liu H.** 2015. The WOR1 5' untranslated region regulates white-opaque switching in  
909 *Candida albicans* by reducing translational efficiency. *Mol Microbiol* **97**:125-138.

- 910 54. **Childers DS, Mundodi V, Banerjee M, Kadosh D.** 2014. A 5' UTR-mediated translational  
911 efficiency mechanism inhibits the *Candida albicans* morphological transition. *Mol Microbiol*  
912 **92**:570-585.
- 913 55. **Mayr C.** 2017. Regulation by 3'-Untranslated Regions. *Annu Rev Genet* **51**:171-194.
- 914 56. **Kim JM, Vanguri S, Boeke JD, Gabriel A, Voytas DF.** 1998. Transposable elements and genome  
915 organization: a comprehensive survey of retrotransposons revealed by the complete  
916 *Saccharomyces cerevisiae* genome sequence. *Genome Res* **8**:464-478.
- 917 57. **Goodwin TJ, Poulter RT.** 2000. Multiple LTR-retrotransposon families in the asexual yeast  
918 *Candida albicans*. *Genome Res* **10**:174-191.
- 919 58. **Anderson MZ, Gerstein AC, Wigen L, Baller JA, Berman J.** 2014. Silencing is noisy: population  
920 and cell level noise in telomere-adjacent genes is dependent on telomere position and sir2. *PLoS*  
921 *Genet* **10**:e1004436.
- 922 59. **Moran GP, Anderson MZ, Myers LC, Sullivan DJ.** 2019. Role of Mediator in virulence and  
923 antifungal drug resistance in pathogenic fungi. *Curr Genet* **65**:621-630.
- 924 60. **Brown DH, Jr., Giusani AD, Chen X, Kumamoto CA.** 1999. Filamentous growth of *Candida*  
925 *albicans* in response to physical environmental cues and its regulation by the unique CZF1 gene.  
926 *Mol Microbiol* **34**:651-662.
- 927 61. **Hernday AD, Lohse MB, Fordyce PM, Nobile CJ, DeRisi JL, Johnson AD.** 2013. Structure of the  
928 transcriptional network controlling white-opaque switching in *Candida albicans*. *Mol Microbiol*  
929 **90**:22-35.
- 930 62. **Calderone R, Li D, Traven A.** 2015. System-level impact of mitochondria on fungal virulence: to  
931 metabolism and beyond. *FEMS Yeast Res* **15**:fov027.
- 932 63. **Grahl N, Demers EG, Lindsay AK, Harty CE, Willger SD, Piispanen AE, Hogan DA.** 2015.  
933 Mitochondrial Activity and Cyr1 Are Key Regulators of Ras1 Activation of *C. albicans* Virulence  
934 Pathways. *PLoS Pathog* **11**:e1005133.
- 935 64. **Kim SW, Joo YJ, Chun YJ, Park YK, Kim J.** 2019. Cross-talk between Tor1 and Sch9 regulates  
936 hyphae-specific genes or ribosomal protein genes in a mutually exclusive manner in *Candida*  
937 *albicans*. *Mol Microbiol* **112**:1041-1057.
- 938 65. **Langfelder P, Horvath S.** 2008. WGCNA: an R package for weighted correlation network analysis.  
939 *BMC Bioinformatics* **9**:559.
- 940 66. **Cleary IA, Lazzell AL, Monteagudo C, Thomas DP, Saville SP.** 2012. BRG1 and NRG1 form a novel  
941 feedback circuit regulating *Candida albicans* hypha formation and virulence. *Mol Microbiol*  
942 **85**:557-573.
- 943 67. **Richard ML, Nobile CJ, Bruno VM, Mitchell AP.** 2005. *Candida albicans* biofilm-defective  
944 mutants. *Eukaryot Cell* **4**:1493-1502.
- 945 68. **Kordes A, Preusse M, Willger SD, Braubach P, Jonigk D, Haverich A, Warnecke G, Haussler S.**  
946 2019. Genetically diverse *Pseudomonas aeruginosa* populations display similar transcriptomic  
947 profiles in a cystic fibrosis explanted lung. *Nat Commun* **10**:3397.
- 948 69. **Hazen TH, Daugherty SC, Shetty AC, Nataro JP, Rasko DA.** 2017. Transcriptional Variation of  
949 Diverse Enteropathogenic *Escherichia coli* Isolates under Virulence-Inducing Conditions.  
950 *mSystems* **2**.
- 951 70. **Le Gall T, Darlu P, Escobar-Paramo P, Picard B, Denamur E.** 2005. Selection-driven  
952 transcriptome polymorphism in *Escherichia coli*/*Shigella* species. *Genome Res* **15**:260-268.
- 953 71. **Vital M, Chai B, Ostman B, Cole J, Konstantinidis KT, Tiedje JM.** 2015. Gene expression analysis  
954 of *E. coli* strains provides insights into the role of gene regulation in diversification. *ISME J*  
955 **9**:1130-1140.



- 956 72. **Jaeger BN, Linker SB, Parylak SL, Barron JJ, Gallina IS, Saavedra CD, Fitzpatrick C, Lim CK,**  
957 **Schafer ST, Lacar B, Jessberger S, Gage FH.** 2018. A novel environment-evoked transcriptional  
958 signature predicts reactivity in single dentate granule neurons. *Nat Commun* **9**:3084.
- 959 73. **Maamar H, Raj A, Dubnau D.** 2007. Noise in gene expression determines cell fate in *Bacillus*  
960 *subtilis*. *Science* **317**:526-529.
- 961 74. **Vihervaara A, Mahat DB, Guertin MJ, Chu T, Danko CG, Lis JT, Sistonen L.** 2017. Transcriptional  
962 response to stress is pre-wired by promoter and enhancer architecture. *Nat Commun* **8**:255.
- 963 75. **Pradhan A, Avelar GM, Bain JM, Childers D, Pelletier C, Larcombe DE, Shekhova E, Netea MG,**  
964 **Brown GD, Erwig L, Gow NAR, Brown AJP.** 2019. Non-canonical signalling mediates changes in  
965 fungal cell wall PAMPs that drive immune evasion. *Nat Commun* **10**:5315.
- 966 76. **Sorrells TR, Johnson AD.** 2015. Making sense of transcription networks. *Cell* **161**:714-723.
- 967 77. **Amiri A, Coppola G, Scuderi S, Wu F, Roychowdhury T, Liu F, Pochareddy S, Shin Y, Safi A, Song**  
968 **L, Zhu Y, Sousa AMM, Psych EC, Gerstein M, Crawford GE, Sestan N, Abyzov A, Vaccarino FM.**  
969 2018. Transcriptome and epigenome landscape of human cortical development modeled in  
970 organoids. *Science* **362**.
- 971 78. **Nowakowski TJ, Bhaduri A, Pollen AA, Alvarado B, Mostajo-Radji MA, Di Lullo E, Haeussler M,**  
972 **Sandoval-Espinosa C, Liu SJ, Velmeshv D, Ounadjela JR, Shuga J, Wang X, Lim DA, West JA,**  
973 **Leyrat AA, Kent WJ, Kriegstein AR.** 2017. Spatiotemporal gene expression trajectories reveal  
974 developmental hierarchies of the human cortex. *Science* **358**:1318-1323.
- 975 79. **Argilaguuet J, Pedragosa M, Esteve-Codina A, Riera G, Vidal E, Peligero-Cruz C, Casella V,**  
976 **Andreu D, Kaisho T, Bocharov G, Ludewig B, Heath S, Meyerhans A.** 2019. Systems analysis  
977 reveals complex biological processes during virus infection fate decisions. *Genome Res* **29**:907-  
978 919.
- 979 80. **Rossi DCP, Gleason JE, Sanchez H, Schatzman SS, Culbertson EM, Johnson CJ, McNees CA,**  
980 **Coelho C, Nett JE, Andes DR, Cormack BP, Culotta VC.** 2017. *Candida albicans* FRE8 encodes a  
981 member of the NADPH oxidase family that produces a burst of ROS during fungal  
982 morphogenesis. *PLoS Pathog* **13**:e1006763.
- 983 81. **Schrevers S, Van Zeebroeck G, Riedelberger M, Tournu H, Kuchler K, Van Dijck P.** 2018.  
984 Methionine is required for cAMP-PKA mediated morphogenesis and virulence of *Candida*  
985 *albicans*. *Mol Microbiol* **109**:415-416.
- 986 82. **Silao FGS, Ward M, Ryman K, Wallstrom A, Brindefalk B, Udekwu K, Ljungdahl PO.** 2019.  
987 Mitochondrial proline catabolism activates Ras1/cAMP/PKA-induced filamentation in *Candida*  
988 *albicans*. *PLoS Genet* **15**:e1007976.
- 989 83. **Lu Y, Su C, Liu H.** 2012. A GATA transcription factor recruits Hda1 in response to reduced Tor1  
990 signaling to establish a hyphal chromatin state in *Candida albicans*. *PLoS Pathog* **8**:e1002663.
- 991 84. **Su C, Yu J, Sun Q, Liu Q, Lu Y.** 2018. Hyphal induction under the condition without inoculation in  
992 *Candida albicans* is triggered by Brg1-mediated removal of NRG1 inhibition. *Mol Microbiol*  
993 **108**:410-423.
- 994 85. **Guthrie C, Fink GR.** 1991. *Guide to Yeast Genetics and Molecular Biology*. Academic Press, San  
995 Diego.
- 996 86. **Parkhomchuk D, Borodina T, Amstislavskiy V, Banaru M, Hallen L, Krobtsch S, Lehrach H,**  
997 **Soldatov A.** 2009. Transcriptome analysis by strand-specific sequencing of complementary DNA.  
998 *Nucleic Acids Res* **37**:e123.
- 999 87. **Levin JZ, Yassour M, Adiconis X, Nusbaum C, Thompson DA, Friedman N, Gnirke A, Regev A.**  
1000 2010. Comprehensive comparative analysis of strand-specific RNA sequencing methods. *Nat*  
1001 *Methods* **7**:709-715.

- 1002 88. **Anderson MZ, Porman AM, Wang N, Mancera E, Huang D, Cuomo CA, Bennett RJ.** 2016. A  
1003 Multistate Toggle Switch Defines Fungal Cell Fates and Is Regulated by Synergistic Genetic Cues.  
1004 PLoS Genet **12**:e1006353.
- 1005 89. **Kim D, Pertea G, Trapnell C, Pimentel H, Kelley R, Salzberg SL.** 2013. TopHat2: accurate  
1006 alignment of transcriptomes in the presence of insertions, deletions and gene fusions. Genome  
1007 Biol **14**:R36.
- 1008 90. **Anders S, Pyl PT, Huber W.** 2015. HTSeq--a Python framework to work with high-throughput  
1009 sequencing data. Bioinformatics **31**:166-169.
- 1010 91. **Robinson MD, McCarthy DJ, Smyth GK.** 2010. edgeR: a Bioconductor package for differential  
1011 expression analysis of digital gene expression data. Bioinformatics **26**:139-140.
- 1012 92. **Dobin A, Davis CA, Schlesinger F, Drenkow J, Zaleski C, Jha S, Batut P, Chaisson M, Gingeras TR.**  
1013 2013. STAR: ultrafast universal RNA-seq aligner. Bioinformatics **29**:15-21.
- 1014 93. **Arnaud MB, Costanzo MC, Shah P, Skrzypek MS, Sherlock G.** 2009. Gene Ontology and the  
1015 annotation of pathogen genomes: the case of *Candida albicans*. Trends Microbiol **17**:295-303.
- 1016 94. **Zhang B, Horvath S.** 2005. A general framework for weighted gene co-expression network  
1017 analysis. Stat Appl Genet Mol Biol **4**:Article17.
- 1018 95. **Reuss O, Vik A, Kolter R, Morschhauser J.** 2004. The SAT1 flipper, an optimized tool for gene  
1019 disruption in *Candida albicans*. Gene **341**:119-127.
- 1020 96. **Hernday AD, Noble SM, Mitrovich QM, Johnson AD.** 2010. Genetics and molecular biology in  
1021 *Candida albicans*. Methods Enzymol **470**:737-758.
- 1022 97. **Jacobus AP, Gross J.** 2015. Optimal cloning of PCR fragments by homologous recombination in  
1023 *Escherichia coli*. PLoS One **10**:e0119221.
- 1024 98. **Nguyen N, Quail MMF, Hernday AD.** 2017. An Efficient, Rapid, and Recyclable System for  
1025 CRISPR-Mediated Genome Editing in *Candida albicans*. mSphere **2**.
- 1026 99. **Dunn MJ, Fillinger RJ, Anderson LM, Anderson MZ.** 2020. Automated quantification of *Candida*  
1027 *albicans* biofilm-related phenotypes reveals additive contributions to biofilm production. NPJ  
1028 Biofilms Microbiomes **6**:36.

1029

1030

1031 **FIGURE LEGENDS**

1032

1033 **Figure 1. Gene expression does not reflect strain phylogeny. A.** Hierarchical  
1034 clustering of strains by Spearman's correlation and average distances was performed  
1035 for transcript abundance of the 6,468 genes across *C. albicans* strains using averaged  
1036 values between replicates. Clade designation based on reported fingerprinting clades  
1037 (FP) are indicated by color. **B.** Gene expression was averaged among biological  
1038 replicates and the averages were compared between individual strains. Spearman's  
1039 correlation values were calculated in all pairwise combinations and visualized as a heat  
1040 map ordered to reflect phylogenetic relatedness. FP clades are color coded and clades  
1041 with strong clustering are outlined in yellow. **C.** The genetic similarity between isolates  
1042 (x-axis) was compared to similarity in transcript abundance as defined in **B** (y-axis).  
1043 Pairwise comparisons between all strains are represented as dots and color-coded to  
1044 denote intra-clade comparisons (I-red, II-orange, III-blue, SA-dark gray) or marked as  
1045 light gray for comparison across clades. Two clusters emerged with inter-clade  
1046 comparisons showing less nucleotide similarity and a greater range of expression  
1047 correlation scores (left) that extended below intra-clade comparisons (right). Two  
1048 recombinant isolates, P60002 and P94015 (indicated in purple and magenta,  
1049 respectively), clustered only within inter-clade comparisons. **D.** Clade gene expression  
1050 profiles were built using the average of all strains within the clade. The clade-average  
1051 profiles were compared by Spearman's correlation and visualized by a heat map.

1052

1053

1054 **Figure 2. Differential expression predicts genes associated with *C. albicans***  
1055 **phenotypes. A.** The workflow used to identify phenotype-associated genes is depicted.  
1056 Phenotyping results for 8 traits determined in *Hirakawa et al.*, were used to: (1) screen  
1057 strains to (2) identify strains with extreme phenotypes. (3) Differential gene expression  
1058 (2-fold change,  $q < 0.05$ ) was identified among strains with opposing phenotypic groups,  
1059 and (4) enrichment analysis performed for biological terms. **B.** The fold change in  
1060 expression between groups with opposing phenotypic measurements as defined in **A** is  
1061 plotted for all genes and the eight phenotypes investigated. Genes showing significantly  
1062 different expression levels between the opposing phenotypic groups are color-coded by  
1063 phenotype and genes without statistically supported differences are in gray. **C.**  
1064 Transcripts per million (TPM) value are plotted as a heatmap on a  $\log_2$  scale for  
1065 differentially expressed genes within the enriched gene ontology term 'Single species  
1066 biofilm formation' between strains that filament poorly (low) or profusely (high) on Spider  
1067 agar medium at 30°C. Two biological replicates per strain are displayed. **D.** The TPM  
1068 values for each euploid (blue) and aneuploid (red) isolate sample are plotted for the two  
1069 differentially expressed genes within the enriched GO term for aneuploidy.

1070

1071 **Figure 3. Linear regression reveals genes correlated with *C. albicans* phenotypic**  
1072 **traits. A.** Expression of each gene and quantitative phenotype scores from all biological  
1073 replicates were fit to a linear model and tested for significance using Pearson's  
1074 correlation. The correlation score was plotted for each of 23 phenotypes and color-  
1075 coded by phenotype for significantly associated genes. Gray points indicate no  
1076 significant association. **B.** Representative correlation scores for components of the

1077 Mediator transcriptional regulator complex with growth in Spider medium at 30°C are  
1078 indicated on the right. Mediator components significantly associated with these growth  
1079 conditions are indicated in the Mediator schematic by thick black outlines. **C.** The  
1080 expression of three genes previously known to be involved in *C. albicans* filamentation  
1081 are plotted for the 21 isolates compared to their filamentation score on Spider solid  
1082 medium at 30°C. The regulatory relationship of the three genes is indicated by arrows.  
1083 **D.** The transcripts per million (TPM) value of all annotated ribosomal genes in the *C.*  
1084 *albicans* genome is plotted for the 21 isolates by ascending filamentation scores on  
1085 solid Spider medium at 30°C. A best fit line is indicated in red.

1086

1087 **Figure 4. Co-expression modules reconstruct biological relationships in *C.***

1088 ***albicans* cells.** **A.** A weighted gene co-expression network analysis (WGCNA) of  
1089 transcript abundance across all strains resolved 43 modules. A gene dendrogram  
1090 obtained by average linkage hierarchical clustering is depicted above each associated  
1091 module. ME8 and ME30 are indicated. **B.** The relationship between genes within all  
1092 modules was visualized using a correlation cut-off of 0.93. Eight of the ten largest  
1093 modules formed connections with each other and are color-coded as indicated. The  
1094 relationship between each module is represented spatially where genes are  
1095 represented as individual points and their correlated expression by edges.

1096

1097 **Figure 5. Identification of a gray-specific module associated with cell state growth**

1098 **differences.** **A.** Two modules defined by WGCNA, ME8 and ME30, were correlated to  
1099 phenotypes of the set of 21 *C. albicans* isolates. Significant associations are indicated

1100 by increasingly darker red hues and gray indicates no association. Each cell provides  
1101 the Pearson's correlation statistic (top) and q-value (bottom). **B.** A heatmap represents  
1102 the transcripts per million (TPM) gene expression of ME8 genes on a log<sub>2</sub> scale ranging  
1103 from -6 to 6 for biological replicates for three isolates, SC5314, 19F and P37037. Genes  
1104 in bold were tested experimentally. **C.** Strong correlated expression of 18 genes from  
1105 ME8 is depicted where each gene is represented by nodes and correlated expression  
1106 shown as edges. Correlation scores are >90%. **D.** The white and gray cell states found  
1107 in P37037 are shown for both colonies and cell images (at 40x magnification). The  
1108 *EFG1* locus was genotyped by Sanger sequencing from both P37037 cell types.  
1109 P37037 white cells encoded a heterozygous G/A and gray cells encoded a homozygous  
1110 A/A at nucleotide 755 in *EFG1*. **E.** Growth rates for P37037 white and gray cell states.  
1111 The average doubling time during logarithmic phase growth was determined in YPD,  
1112 Spider, and minimal SD media and plotted as the mean with standard deviations. N=6.  
1113 **F.** Growth curves during an 18-hour window are displayed for wildtype,  $\Delta/\Delta ofi1$ , and  
1114  $\Delta/\Delta ofi1+OFI1$  strains in the P37037 background and color coded as indicated.  
1115 Measurements of optical density were taken in 15-minute intervals. **G.** Growth rates for  
1116 white (left) and gray (right) cells in the wildtype, three mutant lines ( $\Delta/\Delta kns1$ ,  $\Delta/\Delta ofi1$ ,  
1117  $\Delta/\Delta zcf31$ ), and their complemented P37037 strains. Significance was determined  
1118 relative to the wildtype. N=6. \*\* denotes p<0.01. \*\*\* denotes p<0.001.

1119

1120 **Figure 6. Genes within a co-expression module promote *C. albicans* filamentation**  
1121 **across conditions. A.** A heatmap represents the RNA transcripts per million (TPM) of  
1122 all ME30 genes on a log<sub>2</sub> scale ranging from -6 to 6 for SC5314 and P37037, isolates

1123 that filament strongly and poorly across multiple conditions, respectively. Genes in bold  
1124 were tested experimentally. Colony images were taken following growth on Spider agar  
1125 medium at 30°C for 7 days. **B.** SC5314 wildtype cells, mutants in five genes from the  
1126 ME30 module, and the complemented mutants were grown for one and four hours in  
1127 RPMI at 30°C and visualized at 40x magnification. Scale bar = 5 microns. **C.** The  
1128 fraction of filamentous cells are plotted for SC5314 wildtype cells, mutants in five genes  
1129 from the ME30 module, and the complemented mutants. N = 9,11, 4, 10, 4, 10, 4, 7, 4,  
1130 8, 4 for one hour and N = 9,10, 4, 10, 4, 10, 4, 10, 4, 10, 4 for four hours in order left to  
1131 right. **D.** The filamentation score for SC5314 wildtype, ME 30 mutants, and the  
1132 complemented mutants following growth on solid YPD (left) or Spider (right) media for  
1133 seven days. N = 14, 14, 6, 14, 7, 13, 7, 9, 6, 19, 7 for YPD and 17, 12, 6, 12, 6, 8, 7, 8,  
1134 7, 14, 6 for Spider for strains from left to right. Significance was determined relative to  
1135 the wildtype. \* denotes  $p < 0.05$ . \*\* denotes  $p < 0.01$ . \*\*\* denotes  $p < 0.001$ .

1136

1137 **Supplemental Figure 1. Phylogenetic relationship of *C. albicans* strains used in**  
1138 **this study.** The phylogenetic relationship of the 21 *C. albicans* isolates used for  
1139 transcriptional profiling is shown based on comparison of full genome sequences.  
1140 Bootstrap support for each node is indicated. Assignment of isolates to fingerprinting  
1141 clades are color coded.

1142

1143 **Supplemental Figure 2. Correlation of gene expression with phylogenetic**  
1144 **relationships among the *C. albicans* isolates. A.** Read counts were calculated for all  
1145 genes from each strain and binned based on the transcripts per million (TPM) value.

1146 The fraction of reads within each bin was then plotted per strain. Clade assignments for  
1147 each strain are color-coded as indicated. **B.** Similarity in transcript profiles among the 42  
1148 biological samples was assessed by hierarchical clustering of TPM values using  
1149 Euclidean distance and average linkage. 1000 bootstraps were performed. The  
1150 resulting bootstrap value are shown in green and corresponding approximately  
1151 unbiased (AU) p-values are shown in red at each node. **C.** A heatmap represents the  
1152 RNA transcripts per million (TPM) of the 50 genes with the greatest difference in  
1153 expression among the 21 isolates on a  $\log_2$  scale. The expression for each strain is the  
1154 average of two biological replicates. The strains are ordered based on their  
1155 phylogenetic relationships and their clade assignments are color coded. **D.** The 32  
1156 genes whose expression significantly correlated with the strain phylogeny are listed.  
1157 Genes that contributed to enrichment of the gene ontology (GO) terms associated with  
1158 this list are bolded. Significant GO categories are listed.

1159

1160 **Supplemental Figure 3. Transcriptional profiles are not more similar among**  
1161 **genetically similar strains.** A distance matrix based on similarity in transcriptional  
1162 profiles was constructed for all 21 *C. albicans* isolates. Distances were separated based  
1163 on comparison between strains within the same clade or between strains in different  
1164 clades based on fingerprinting analysis and plotted. Intra-clade and inter-clade  
1165 comparisons were not statistically different.

1166

1167 **Supplemental Figure 4. Greater dissimilarity in gene expression correlates with**  
1168 **more differential gene expression.** The number of differentially expressed genes



1169 between any two strains (adjusted p-value < 0.05, 2-fold cut-off) and the similarity in  
1170 overall gene expression between two strains in all pairwise comparisons was plotted.  
1171 Comparisons were performed in all pairwise combinations for all strains and color-  
1172 coded for comparisons between two strains within the same clade or marked as gray for  
1173 comparison across clades. This data produced an inverse relationship between  
1174 expression similarity and the number of differentially expressed genes.

1175

1176 **Supplemental Figure 5. Strain-specific gene expression among *C. albicans***

1177 **isolates. A.** The number of genes expressed uniquely by one strain compared to all  
1178 other 20 transcriptionally profiled isolates were plotted for each of the 21 isolates.  
1179 Isolates that uniquely expressed a greater number of genes beyond two standard  
1180 deviations are labeled. **B.** The number of strain-specific genes for each isolate is listed.

1181

1182 **Supplemental Figure 6. Untranslated regions (UTRs) in *C. albicans* vary in length**

1183 **with gene function. A.** The UTR length for all genes in each isolate was determined by  
1184 measuring the length of continuous reads extending beyond defined coding sequences  
1185 on the appropriate strand. Lengths for each gene were plotted with 5' UTRs above and  
1186 3' UTRs below the x-axis. Red vertical lines indicate the 95% cutoff value. **B.** The 5'  
1187 UTR was detected from aligned transcripts from each of the 21 sequenced isolates. The  
1188 length of the 5' UTR for each gene was averaged for all genes with detectable  
1189 expression in at least 15 strains. The length of all gene 5' UTRs is plotted alongside  
1190 those of all *C. albicans* transcription factors as defined in the Candida Genome  
1191 Database (<http://candidagenome.org>). **C.** The 3' UTRs of all genes in the *C. albicans*

1192 genome was similarly determined from transcriptional profiling. The 3' UTRs of all genes  
1193 was plotted alongside all genes defined by the gene ontology term 'ribosome'.

1194

1195 **Supplemental Figure 7. Retroelement expression does not correlate with copy**

1196 **number. A.** The abundance of each transposon-associated long-terminal repeat (LTR)

1197 was determined from RNA-Seq for each strain and is shown as a stacked bar and color-

1198 coded to indicate each LTR class. Strains are color-coded by clade. **B.** The number of

1199 retroelements encoded in the genome of each *C. albicans* isolate was determined from

1200 previous whole genome sequencing (11), and plotted against the total transcripts per

1201 million (TPM) value for all retroelements. A linear model was fit to the data to detect a

1202 relationship between copy number and expression.

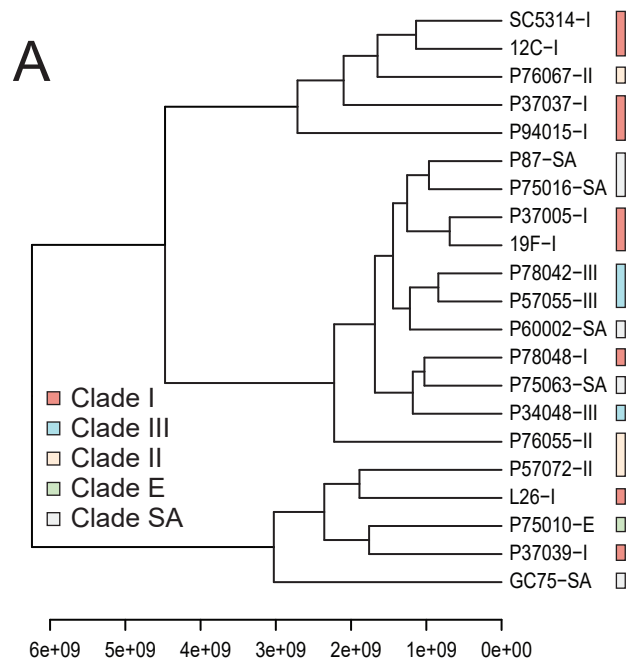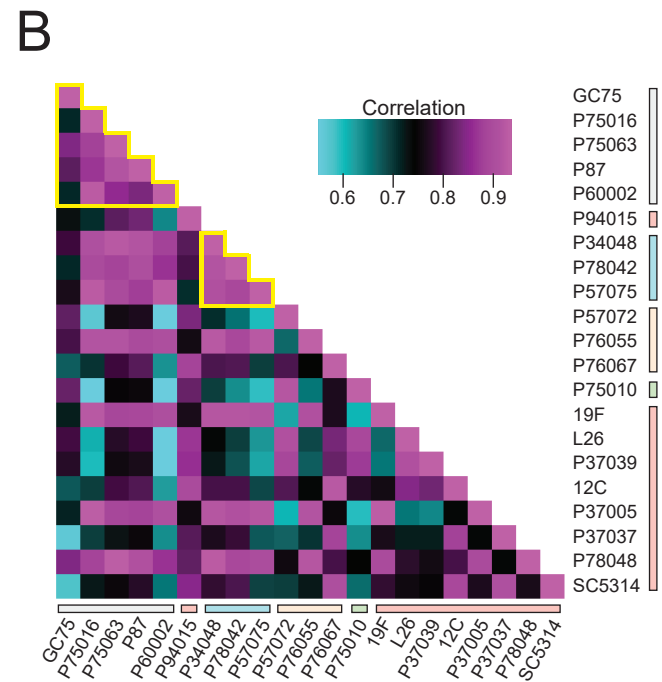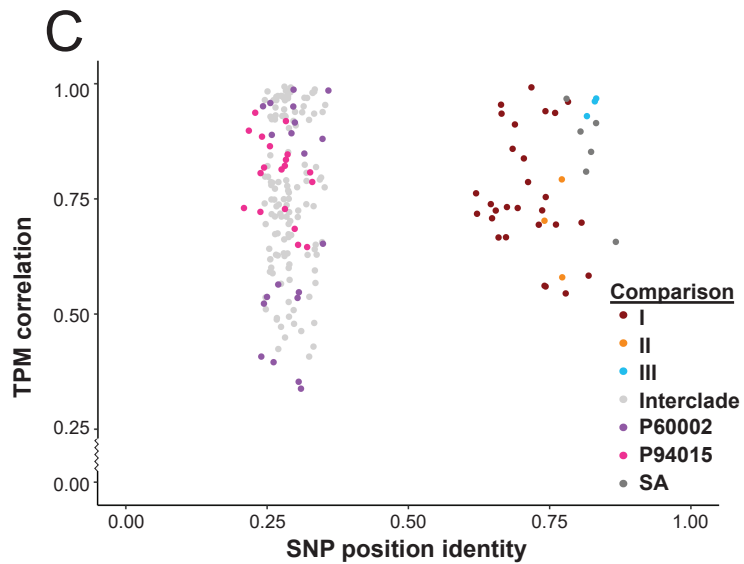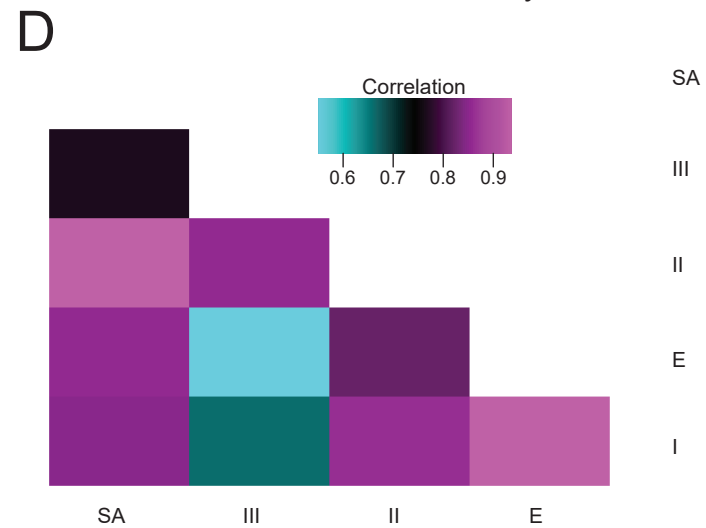

**A**

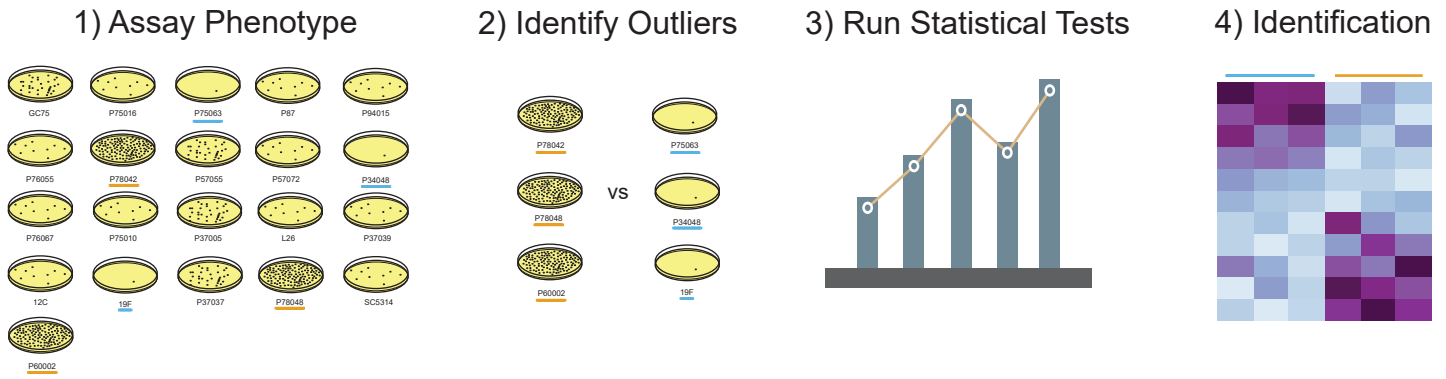

**B**

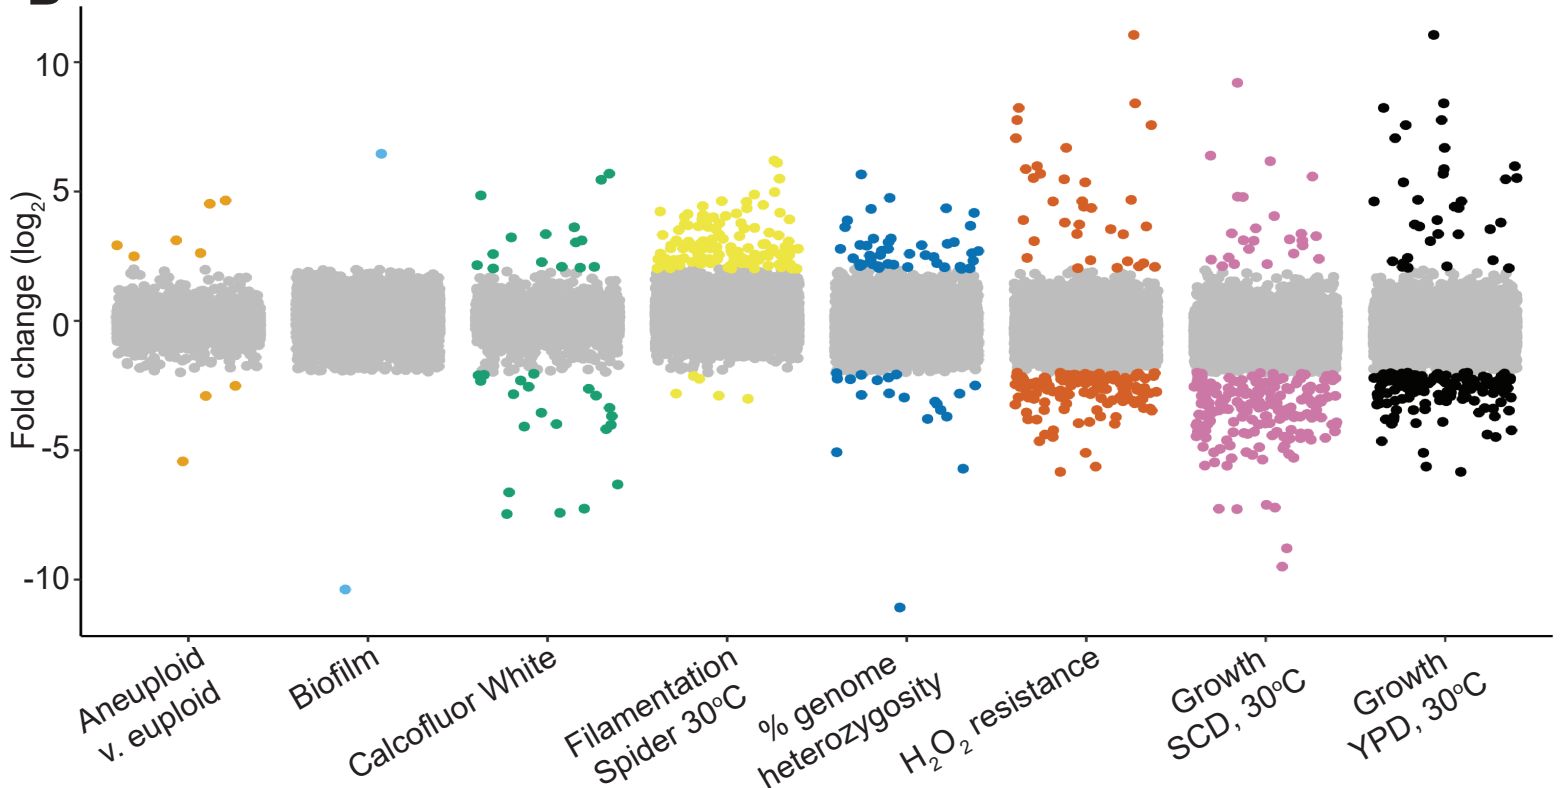

**C**

**Filamentation, 30°C, Spider**  
(Single-species biofilm formation)

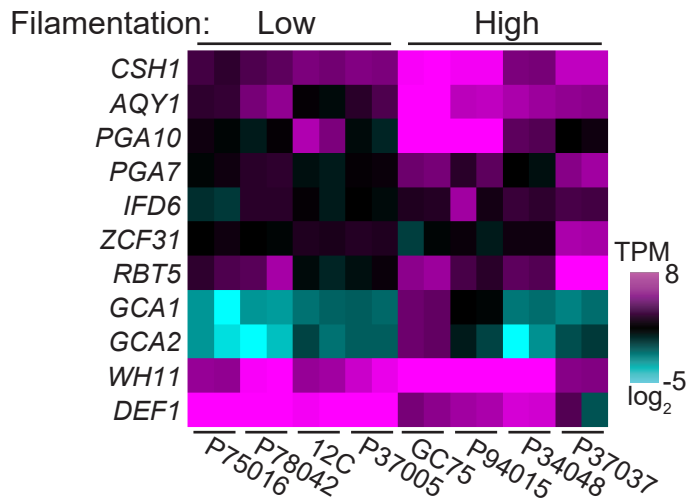

**D**

**Aneuploidy**  
Oxidoreductase activity  
(donor:CH-OH; acceptor:NAD/NADPH)

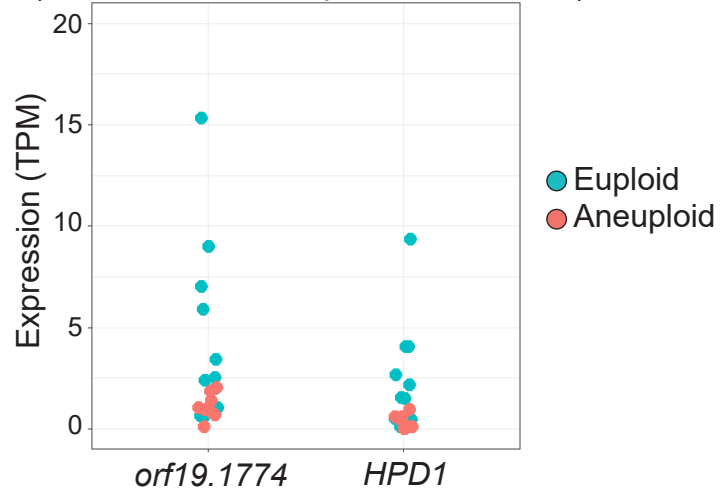

## Figure 5

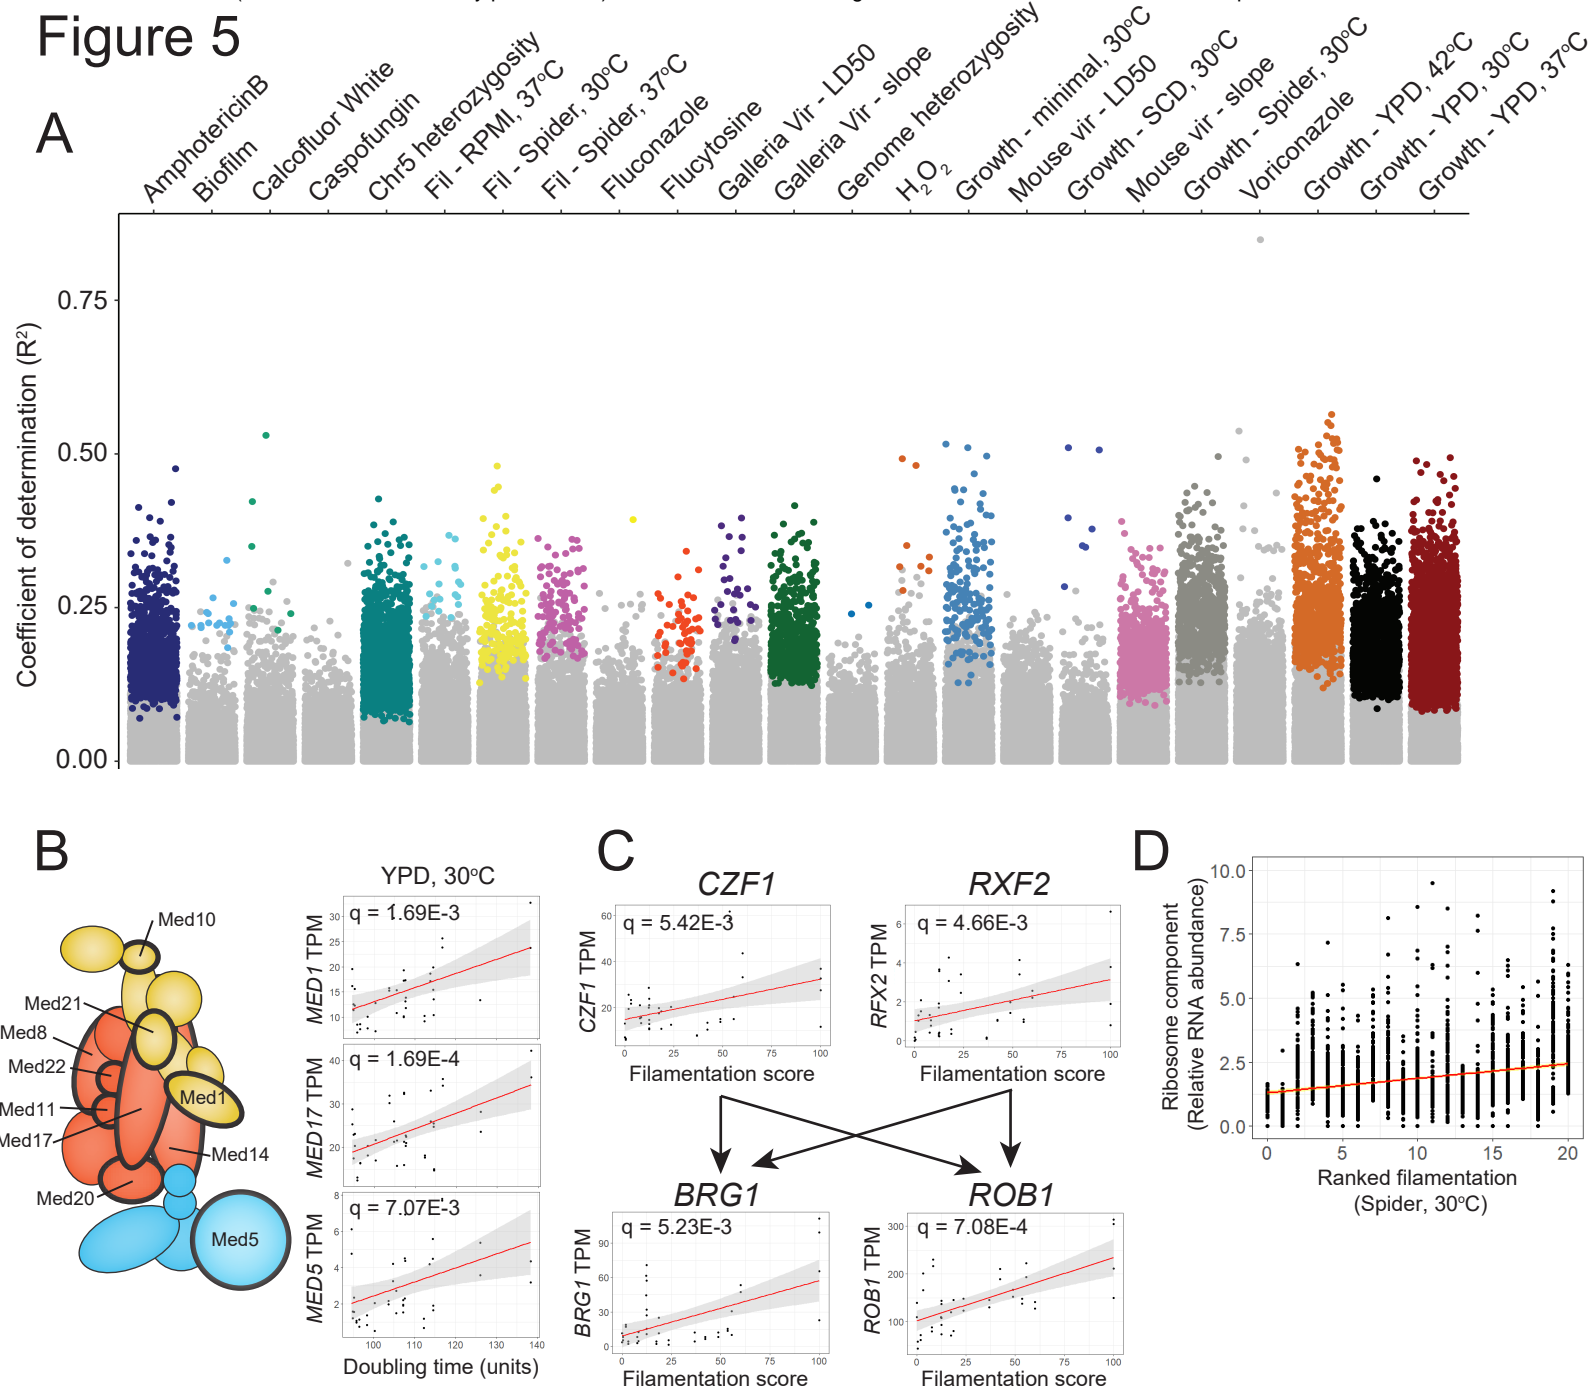

**A**

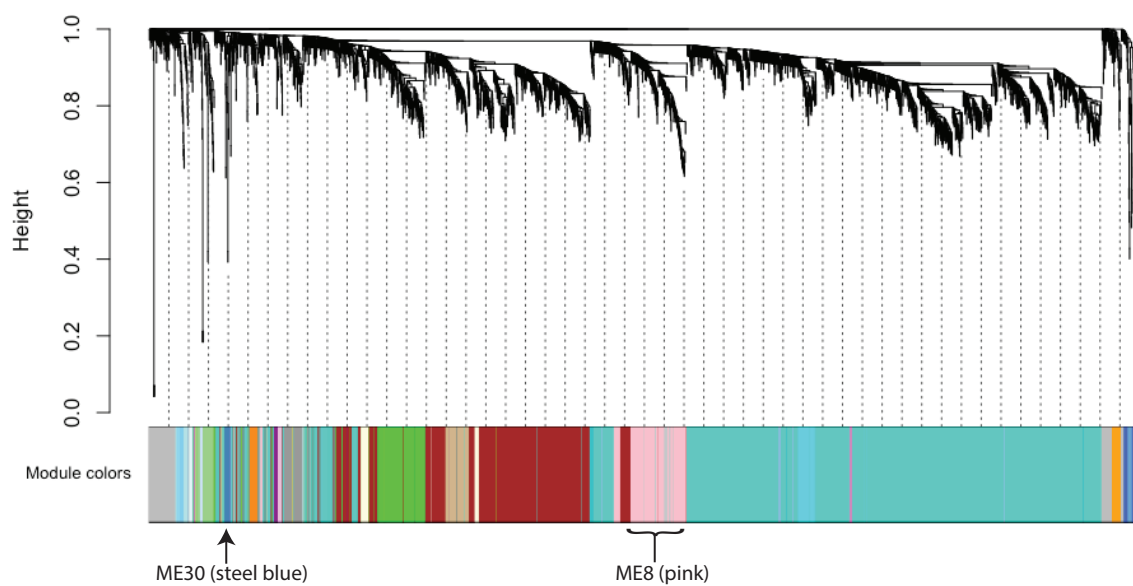

**B**

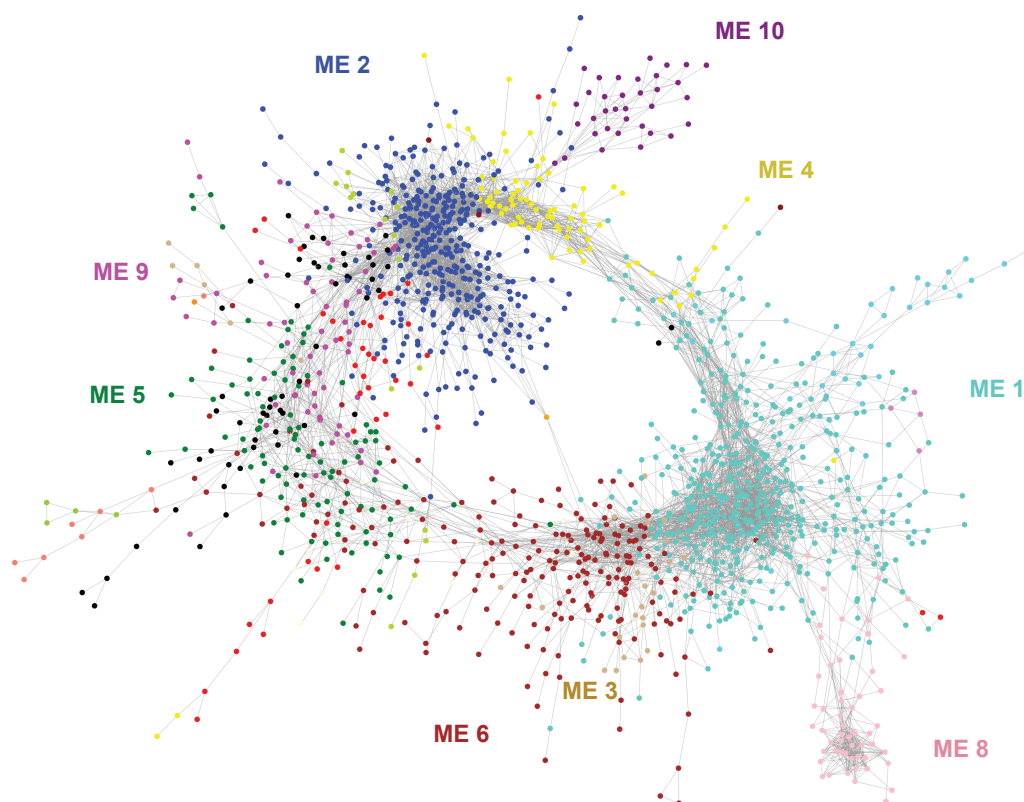

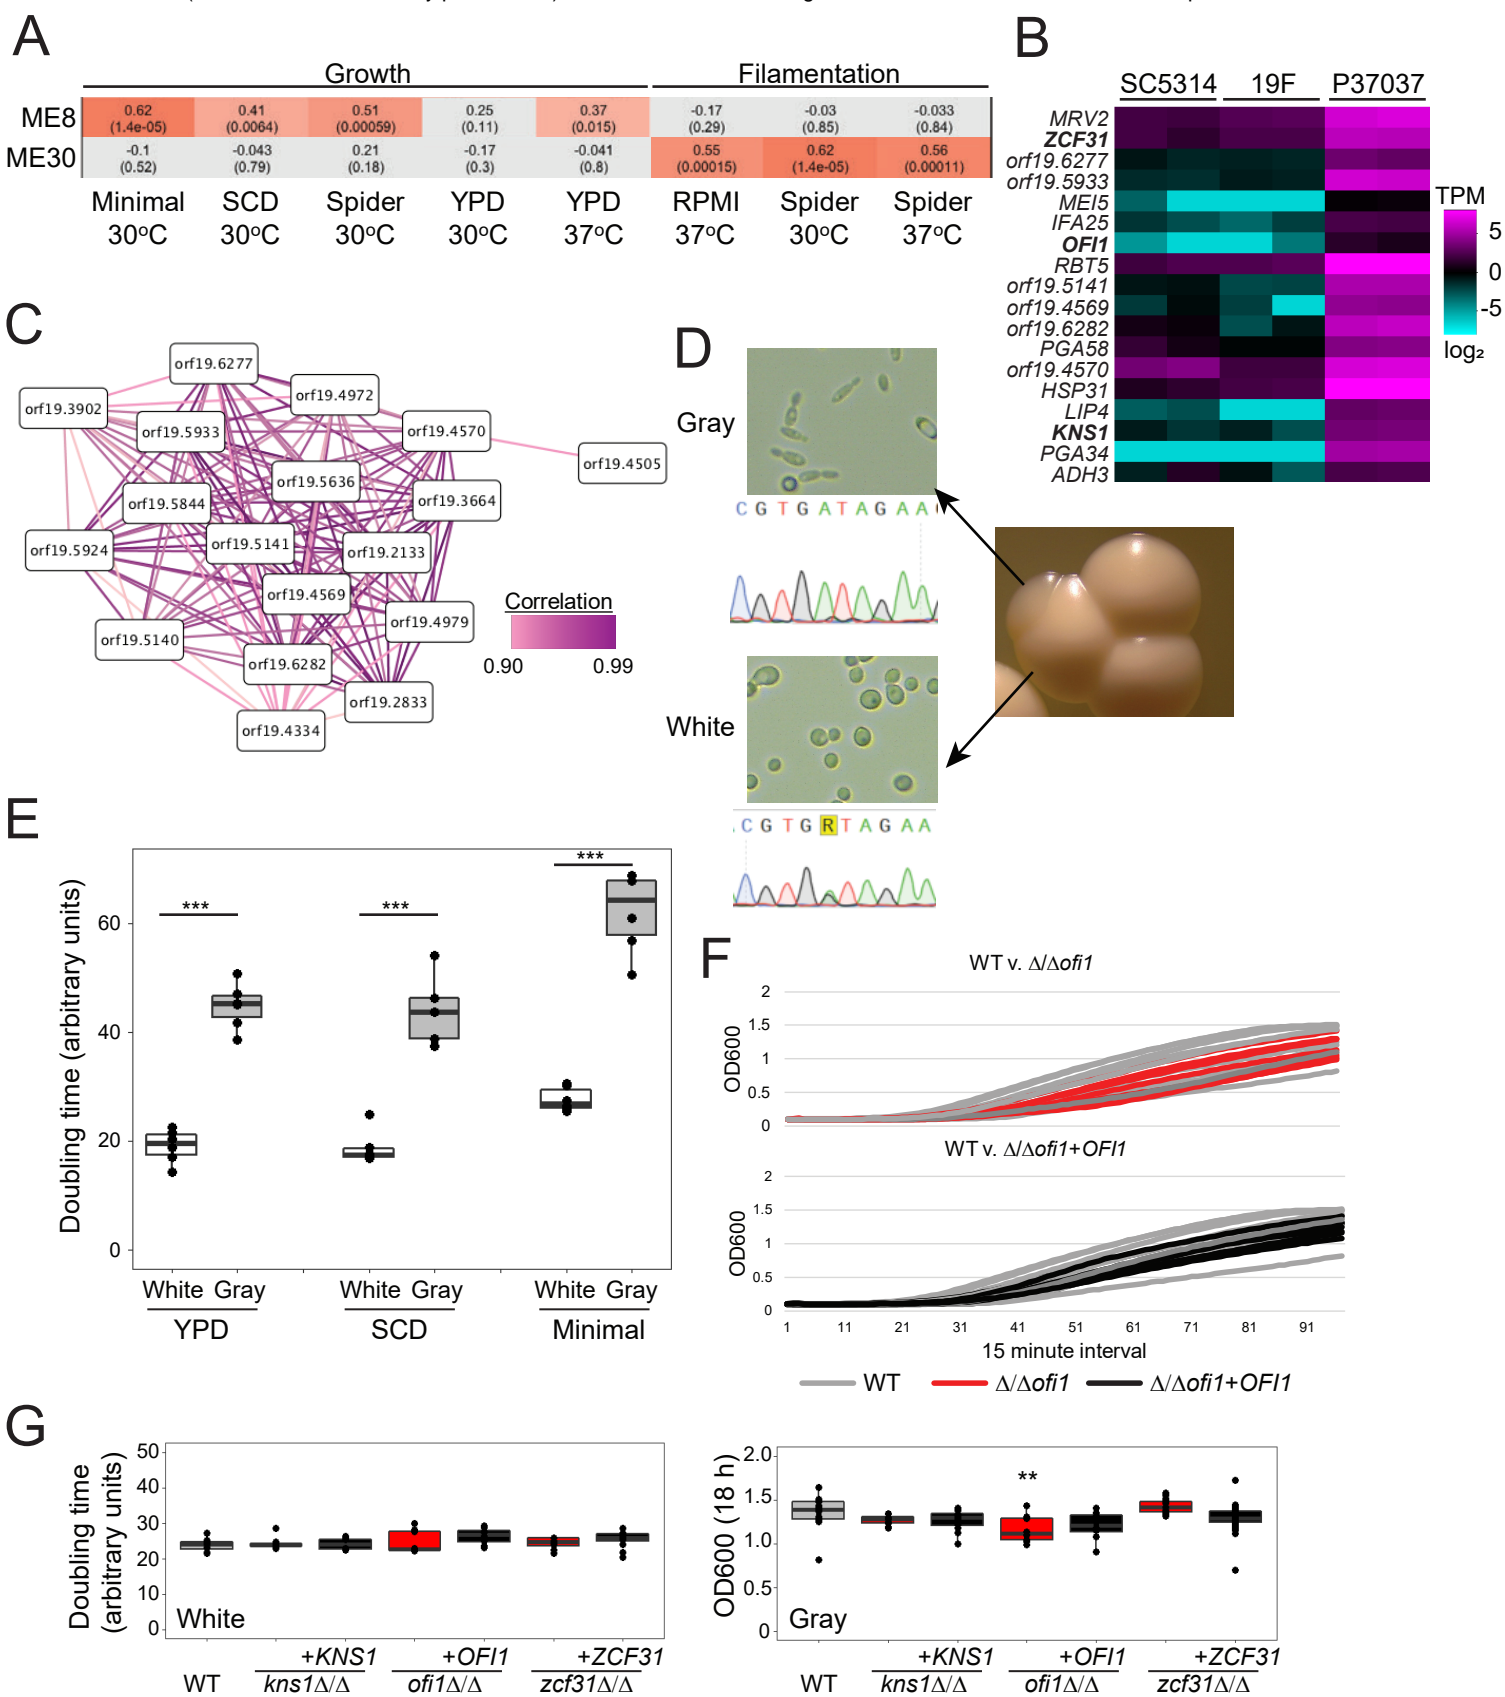

A

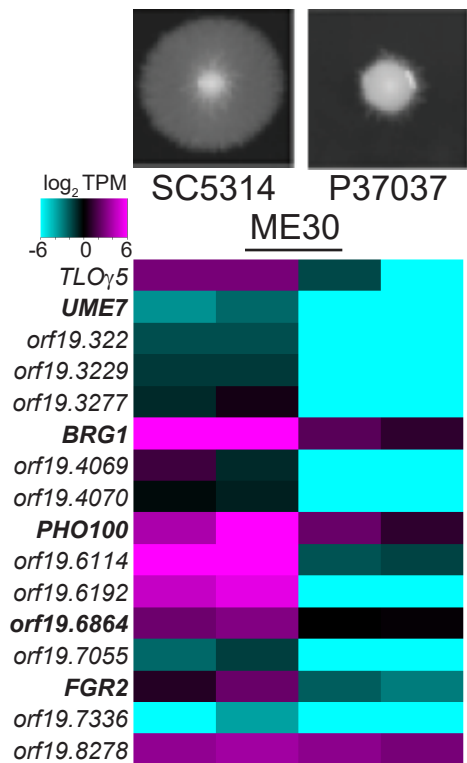

B

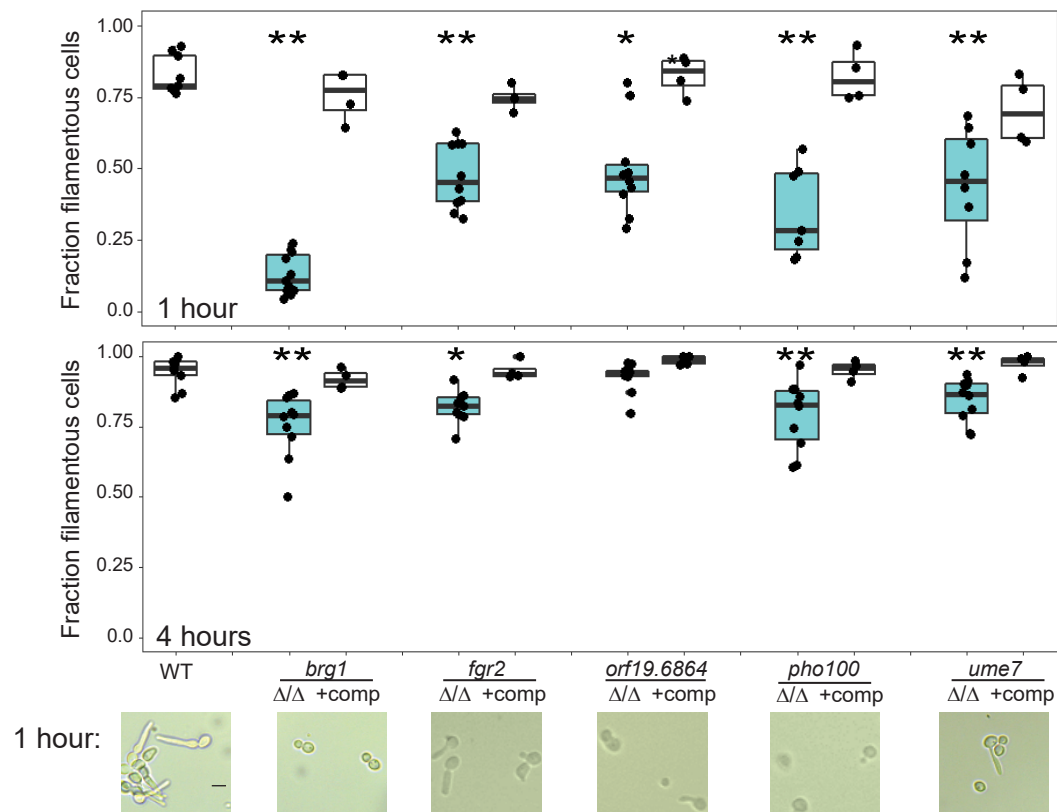

C

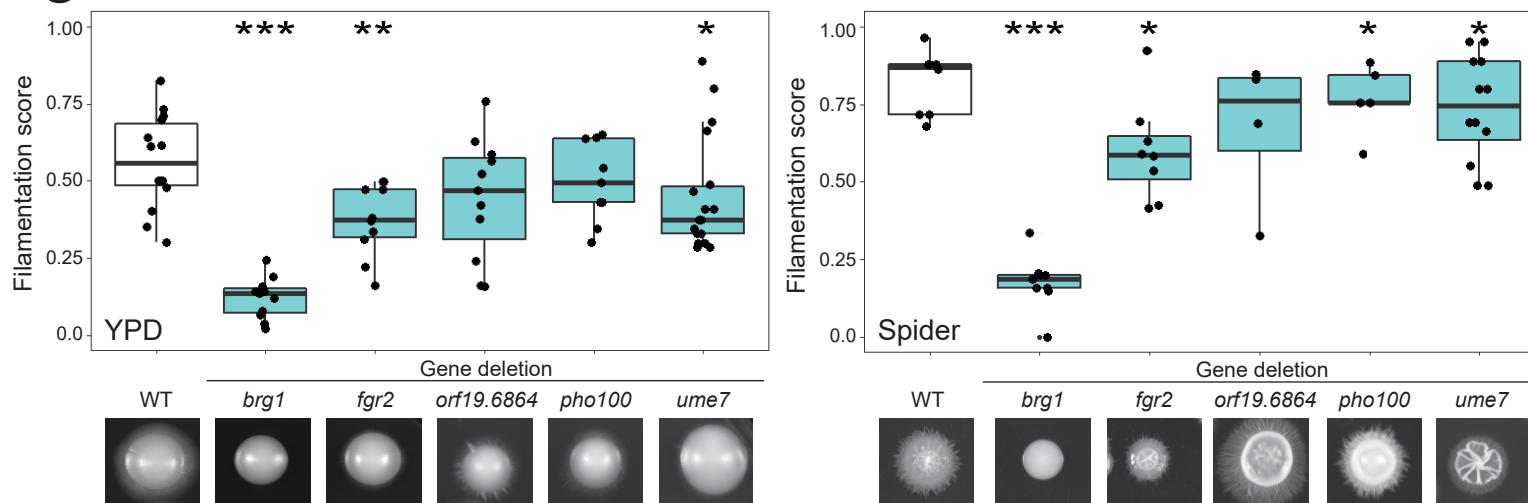

Source: https://biorxiv.org/content/10.1101/2021.03.03.433840v1.full.pdf
